## 1 Cell type-specific variation of somatotopic precision across corticostriatal projections

2  
3 Bryan M. Hooks<sup>1\*</sup>, Andrew E. Papale<sup>1</sup>, Ronald Paletzki<sup>3</sup>, Muhammad Feroze<sup>1</sup>, Brian S.  
4 Eastwood<sup>2</sup>, Jonathan J. Couey<sup>1</sup>, Johan Winnubst<sup>4</sup>, Jayaram Chandrashekar<sup>4</sup>, Charles R.  
5 Gerfen<sup>3\*</sup>

6  
7 <sup>1</sup>Department of Neurobiology, University of Pittsburgh School of Medicine, Pittsburgh, PA

8 <sup>2</sup>MBF Bioscience, Williston, VT

9 <sup>3</sup>Laboratory of Systems Neuroscience, NIMH, Bethesda, MD

10 <sup>4</sup>Janelia Research Campus, Ashburn, VA

11 \*Co-corresponding authors: [hooksm@pitt.edu](mailto:hooksm@pitt.edu) (BMH); [gerfenc@mail.nih.gov](mailto:gerfenc@mail.nih.gov) (CRG)

### 12 13 Abstract

14 The striatum shows general topographic organization and regional differences in behavioral  
15 functions. How corticostriatal topography differs across cortical areas and cell types to support  
16 these distinct functions is unclear. This study contrasted corticostriatal projections from two  
17 layer 5 cell types, intratelencephalic (IT-type) and pyramidal tract (PT-type) neurons, using viral  
18 vectors expressing fluorescent reporters in Cre-driver mice. Long-range corticostriatal  
19 projections from sensory and motor cortex are somatotopic, with a decreasing somatotopic  
20 specificity as injections move from sensory to motor and frontal areas. Somatotopic organization  
21 differs between IT-type and PT-type neurons, including injections in the same site, with IT-type  
22 neurons having higher somatotopic stereotypy than PT-type neurons. Furthermore, IT-type  
23 projections from interconnected cortical areas have stronger correlations in corticostriatal  
24 targeting than PT-type projections do. Thus, as predicted by a long-standing basal ganglia  
25 model, corticostriatal projections of interconnected cortical areas form parallel circuits in basal  
26 ganglia-thalamus-cortex loops.

27  
28 (Word count: 144)

### 29 30 Introduction

31 Primary motor (M1) and primary somatosensory (S1) areas of cerebral cortex are  
32 somatotopically organized, with distinct body regions represented in adjacent areas. Though  
33 sensory and motor cortices specialize in distinct functions, corticocortical projections reciprocally  
34 connect them. Similarly, corticostriatal inputs are topographically organized. Overlaid on this  
35 pattern, however, output from any given cortical area projects broadly and overlaps with output  
36 from other areas, including topographically related ones<sup>1,2</sup>. A longstanding model of  
37 corticostriatal organization is that striatal regions integrate input from multiple cortical areas that  
38 are functionally interconnected<sup>3,4</sup>. This suggests that the striatum is organized into distinct  
39 regions<sup>2</sup> associated with different behavioral functions<sup>5,6</sup>. While there is topographic  
40 organization, different functions of dorsolateral, dorsomedial, and ventral divisions are not  
41 strictly topographic<sup>7,8</sup>. To better understand how information from the cortex is integrated within  
42 the striatum, this study first asks whether projections from different cortical areas project to  
43 stereotyped somatotopic sectors of striatum across animals by quantifying overlap and  
44 segregation between sensory, motor, and frontal projections. As a subsequent step, this data  
45 tests whether corticocortical connectivity predicts convergence or interdigitation within the  
46 striatum.

47 Addressing these questions is not straightforward with conventional anatomical  
48 techniques, since the corticostriatal projection originates from two distinct excitatory neuron  
49 categories in layer 5 (L5): pyramidal tract type (PT-type) neurons and intratelencephalic (IT-  
50 type) neurons<sup>9,10</sup>. PT-type neurons send projections to the thalamus, subthalamic nucleus,  
51 superior colliculus and brainstem with collaterals in ipsilateral striatum<sup>11</sup>, but do not project to  
52 contralateral cortex nor contralateral striatum. In contrast, IT-type cells project exclusively to  
53 ipsi- and contralateral striatum and cortex, and not to subcortical targets<sup>10</sup>. In motor areas, local  
54 circuits are hierarchically organized such that IT-type cells connect to each other and project to  
55 PT-type neurons, but PT-type neurons do not connect to IT-type cells<sup>12</sup>. Thus, information at  
56 different stages of processing is transmitted out of cortex, conveying distinct messages<sup>13</sup>.

57 The differences between the corticostriatal projections of these two major cell types were  
58 analyzed using stereotaxic injection of Cre-dependent reporters into sensory, motor, and frontal  
59 cortical areas of Cre-driver mice selective for IT-type and PT-type neurons. Sectioned brains  
60 were then imaged and aligned to a reference brain, the Mouse Common Coordinate Framework  
61 version 3 (CCF v3)<sup>14-16</sup> to quantify axonal fluorescence in a standard coordinate system.  
62 Targeting of axonal projections in striatum and other targets of motor and sensory output was  
63 quantified to assess the somatotopic organization of projections. This data reveals that the  
64 somatotopic organization of projections differs between IT-type and PT-type neurons and  
65 between sensory and motor areas. Thus, the information cortex provides for striatal processing  
66 differs across these two cortical output channels.

67

68 (Word count: 427)

69

## 70 Results

### 71 Generation of a dense library of IT-type and PT-type corticostriatal projections.

72 To analyze the corticostriatal projections of specific pyramidal cell types, mouse lines  
73 selectively expressing Cre in IT-type (Tlx3\_PL56) and PT-type (Sim1\_KJ18) neurons<sup>17</sup> were  
74 injected with AAV expressing Cre-dependent tracers. Each mouse received injections of 3  
75 different AAV vectors (GFP, td-tomato, and smFPs; Table 1<sup>18</sup>) into different locations of  
76 sensory, motor and frontal cortex (Fig. 1 and Supplementary Fig. 1). A whole-brain  
77 reconstruction from tiled images<sup>19</sup> (Supplementary Fig. 1b-e) was registered to a common  
78 reference frame using BrainMaker software (MBF Bioscience) with alignment precision of ~50-  
79 70  $\mu\text{m}$  (Supplementary Fig. 1l-y). Original images were posted at:  
80 <http://qerfenc.biolumida.net/link?l=JI1tV7>. Placing all voxels from all brains in the same reference  
81 space enabled quantitative analysis of regions of interest across different animals  
82 (Supplementary Fig. 1h-i).

83 As expected for IT-type neurons, injections in Tlx3\_PL56 mice labeled axonal  
84 projections that bilaterally targeted cortex and striatum, but not other subcortical structures<sup>10</sup>  
85 (Fig. 1e). By contrast, axonal projections in the Sim1\_KJ18 line were restricted to the  
86 hemisphere ipsilateral to the injection within the cortex and striatum. Labeled neurons also  
87 projected to the thalamus, subthalamic nucleus, superior colliculus, pontine and medullary  
88 nuclei, typical of PT-type corticofugal neurons<sup>11</sup>. IT-type neurons are generally located in more  
89 superficial layer 5 than PT-type neurons, with considerable overlap. Injections in Sim1\_KJ18  
90 and Tlx3\_PL56 infected a small number of L2/3 neurons. Somata of labeled pyramidal neurons  
91 at injection sites were marked in NeuroLucida and their relative laminar depth plotted (Fig. 1a-d).  
92 Tlx3\_PL56 and Sim1\_KJ18 labeled neurons at injection sites were consistent with prior  
93 descriptions of the laminar locations of IT and PT neurons<sup>20,21</sup>.

94 The coordinates of labeled somata for each injection in the original images were marked  
95 and transformed into the CCF reference frame (Fig. 1f-k), with the average used to determine a  
96 center of mass for the injection site (Fig. 1j). The center of mass was used to cluster injection  
97 sites for Sim1\_KJ18 and Tlx3\_PL56 into 8 clusters across sensory, motor and frontal cortex  
98 (Fig. 1k). These corresponded to vibrissal, forelimb, and orofacial somatosensory cortices (vS1,  
99 fS1, and orfS1); vibrissal, forelimb, and lower limb motor cortices (vM1, fM1, and lIM1); and  
100 frontal areas (anterior lateral motor cortex (ALM) and secondary motor cortex (M2)).  
101 Indeterminate injection sites (black) were not clustered. The names assigned to these sites  
102 correspond to microstimulation mapping for motor areas<sup>22,23</sup> and somatotopic mapping of  
103 sensory areas<sup>24-26</sup>.

104 A methodology was developed to quantitatively compare projections from different  
105 injection sites. Images were thresholded to eliminate 99% of background (Supplementary Fig.  
106 1z). Three example injection sites (from Tlx3\_PL56 mice in vM1, vS1, and ALM) illustrate the  
107 methodology for comparison (Fig. 2). Suprathreshold voxel intensity for ipsilateral striatum was  
108 compared on a voxel-by-voxel basis using voxels that were suprathreshold for *both* channels  
109 (Fig. 2a). The Pearson correlation coefficient (PCC) was used to assess the relationship within  
110 the striatum for each pair of injections (Fig. 2b). To localize where within the striatum  
111 correlations occurred, correlation was computed for each plane along the anterior/posterior axis  
112 (Fig. 2c-e). Correlation values varied dependent on both the particular injection sites and the  
113 rostro-caudal level of the striatum. In the example shown, correlation was near zero in anterior  
114 striatum, but became well correlated for vS1 and vM1 in mid- and posterior ipsilateral striatum  
115 (black line). In contrast, correlation is negative for both vS1 and vM1 when compared to the  
116 ALM injection (yellow and blue lines, Fig. 2e-f). Correlations were noisier when measured based  
117 on small numbers of voxels (anterior and posterior poles of striatum, Fig. 2e-f). The general  
118 pattern was similar for individual injections (Fig. 2e) compared to the population (Fig. 2f), but the  
119 magnitude of correlation varied considerably depending on individual M1 and S1 injections  
120 considered. This anatomical overlap of afferents corresponds to shared targeting of functional  
121 synaptic output to specific single neurons. This was tested using a dual channel circuit mapping  
122 approach with conventional ChR2 and red-shifted ReaChR<sup>27</sup> expressed in vM1 and vS1  
123 respectively. Whole cell recordings from striatal projection neurons (SPNs) in the overlapping  
124 region of vM1 and vS1 projections revealed synaptic convergence in all neurons recorded  
125 (Supplementary Fig. 2). This confirmed that convergent axonal projections, such as those from  
126 somatotopically aligned regions of sensory and motor cortex, also shared functional synaptic  
127 targets.

### 128 129 **Sensory, motor, and frontal corticostriatal projections target somatotopically specific** 130 **areas.**

131 To study somatotopy of ipsilateral corticostriatal projections, this analysis was  
132 extrapolated to all eight injection clusters, which included sensory areas (vS1, fS1, and orfS1),  
133 motor areas (vM1, fM1, and lIM1), and frontal areas (ALM and M2). Sensory, motor, and frontal  
134 areas were taken to be three modalities for cortical function, with the clusters within each  
135 modality representing different somatotopic regions (whisker, forelimb, and hindlimb for  
136 example) within that modality. Projections from different parts of the same cortical modality  
137 displayed a topographic organization along the rostral to caudal axis, demonstrated by the  
138 relationship of the projection of the aforementioned sensory, motor, and frontal areas (Fig. 3a).  
139 This demonstrated the maintenance of the somatotopic organization within modalities in their  
140 projections to the striatum. On the other hand, comparison of the projections between sensory,

141 motor and frontal areas showed considerable overlap (Fig. 3b). Quantitative analysis reveals  
142 varying levels of input from cortical areas along the rostro-caudal axis (Fig. 3c). Somatosensory  
143 injections were biased towards more posterior sites, with maximum intensity and suprathreshold  
144 voxel numbers peaking more caudally than motor or frontal injections.

145 To assess corticostriatal somatotopy, quantitative comparisons were made between  
146 injections in the same injection cluster (Fig. 3d) or across injection sites of the same modality  
147 (Fig. 3e) using the methods described (Fig. 2). Comparison of correlation coefficients between  
148 injections within the same cluster (vS1 to other vS1 injections, Fig. 3d), showed these were  
149 always positively correlated. However, there was remarkably little correlation between injection  
150 sites across clusters of the same modality (Fig. 3e-f; Supplementary Fig. 3). ALM compared to  
151 the other frontal injection, M2, showed near-zero correlation, as did vM1-IIM1, vS1-orfS1, and  
152 orfS1-fS1 comparisons. Where there was positive correlation observed in across-cluster  
153 comparisons, this was weaker than within-cluster comparisons. This suggested stereotypy in  
154 axonal projection patterns across mice. Contralateral corticostriatal projections (Supplementary  
155 Fig. 4) had grossly similar results with weaker overall correlations. Frontal areas, however, had  
156 particularly strong contralateral projections and similarly strong within-cluster correlation. This  
157 demonstrated that striatal targets of somatosensory and motor areas recapitulated some  
158 aspects of cortical topography.

159 This analysis was repeated for PT-type projections grouped into the same eight clusters  
160 by injection site location (Fig. 3g-l). There were general similarities, with frontal and motor  
161 projections targeting more anterior sites and sensory projections targeting more posterior ones.  
162 In contrast to IT-type projections, PT-type projections from frontal areas had fewer  
163 suprathreshold voxels and showed reduced mean voxel intensity compared to IT-type tracing  
164 from the same region (Fig. 3i). This reduction in intensity was consistent with smaller projections  
165 and less overlap between different injection sites. Thus, sensory injections were more  
166 segregated posteriorly in PT-type injections (red in Fig. 3h) compared to IT-type ones (purple in  
167 Fig. 3b). Comparisons for nearby injections in the same cluster (vS1 to vS1) had higher positive  
168 correlations than comparisons to injections in nearby clusters, such as vS1-orfS1 or vS1-fS1  
169 (Fig. 3j-l; Supplementary Fig. 3). The correlations for all within and across group comparisons  
170 were summarized in Fig. 3l. Correlation scores were always higher for within than across group  
171 comparisons. Furthermore, PT-type projections have lower correlations than IT-type ones (Fig.  
172 3f, l).

### 173 174 **Somatotopic specificity differs between IT-type and PT-type projections and between** 175 **sensory and motor areas.**

176 Because these injections densely sampled sensory and motor areas, somatotopic  
177 specificity could be examined by comparing injections at a range of distances in the same or  
178 different cell types. Injection sites from different mice in the same location of the CCF are  
179 expected to share high correlation in their projections if connections in the rodent brain were  
180 stereotypical. Barrel cortex, for example, is sufficiently stereotyped that individual barrels are  
181 apparent in the Allen averaged registration template<sup>16</sup>. In contrast, microstimulation maps for  
182 movement show some inter-animal variability<sup>22,23</sup>. To examine the relationship between the  
183 distance between injection sites and their projections, the distance between injection site  
184 centers of mass was calculated for IT-type or PT-type injections in sensory and motor cortex.  
185 The correlation score in ipsilateral striatum was plotted against injection site offset (Fig. 4). For  
186 both sensory (blue) and motor injections (pink; Fig. 4b,d,f), the correlation score was fit with a  
187 linear regression (95% confidence interval shown). For IT-type projections, the peak correlation

188 was higher for sensory cortical injections (~0.6) than for motor cortex (~0.4). The relationship  
189 dropped off more steeply in sensory areas (ANOCOVA, Group\*X Value,  $p < 0.0001$ ). Collectively,  
190 these results suggest that sensory cortical areas show stronger topography than motor  
191 ones<sup>22,23,26,28-30</sup>. A similar relationship was apparent for PT-type projections, with higher  
192 correlations in nearby sensory injections than in motor areas (ANOCOVA, Group\*X Value,  
193  $p < 0.0001$ ). Peak correlation was stronger for IT-type than PT-type projections for both sensory  
194 and motor populations.

195 The correlation of IT-type with PT-type injections near the same site was also studied. If  
196 these projections targeted different striatal regions, then both a reduction in the correlation as  
197 well as a reduction in the number of overlapping voxels were expected. However, the  
198 correlation versus distance relationship was similar to that of the within PT-type injection  
199 comparisons (Fig. 4f) while the number of overlapping voxels was intermediate to IT-IT and PT-  
200 PT comparisons (Fig. 4e). This was consistent with the center of mass of these injections falling  
201 in generally the same portions of striatum (Fig. 4g-i). Differences in these correlations could thus  
202 not be attributed to IT-type and PT-type neurons from the same cortical area targeting largely  
203 distinct striatal regions.

204 The departure from perfect correlation between projections from nearly overlapping  
205 injection sites could result from differences in the injection size (including number of infected  
206 cells and scatter at the injection site), inter-animal variability, or noise in image acquisition.  
207 Thus, whether different degrees of injection site scatter resulted in less correlation was tested.  
208 Injection site scatter was measured as the standard deviation for each infected soma from the  
209 injection site center of mass in a given injection. This was used to divide injections into two  
210 categories: those with scatter higher or lower than the mean. Correlation of ipsilateral striatal  
211 projections for low and high scatter groups was compared (Supplementary Fig. 5). Two  
212 populations were nearly indistinguishable, suggesting that injection size was not a major  
213 contributor to differences in correlations.

214 One model of corticostriatal organization suggests that striatal regions integrate input  
215 from multiple interconnected cortical areas<sup>4</sup>. This predicts that reciprocally connected regions of  
216 sensory and motor cortex would have elevated correlation in their striatal projections. Thus,  
217 pairwise comparisons between motor and sensory injections were examined. To assess the  
218 degree of corticocortical correlation, overlap of sensory axons in motor cortex (M1) injection  
219 sites (or motor axons in sensory cortex (S1) injection sites) was assessed. The M1 and S1  
220 injection sites were defined in the CCF using coordinates that encompassed all labeled somata  
221 at the motor or sensory injection site, and included all voxels from pia to white matter. The  
222 correlation between a pair of M1 and S1 injections was then determined in this cortical volume,  
223 using the methods described in Fig. 2. Scatterplots compare the corticocortical correlation to the  
224 corticostriatal correlation for the same pair of injections (teal arrows, Fig. 5d-e). Each point  
225 represents the comparison of a single pair of injections. Red points specifically highlight  
226 comparisons between sensory and motor injections. Black points label pairwise comparisons  
227 between frontal areas and either motor (Fig. 5d) or sensory cortex (Fig. 5e). For IT-type  
228 projections, there was a positive relationship for striatal comparisons to M1 and S1 injection  
229 sites (Fig. 5d-e;  $R^2 = 0.3640$  for striatal correlation vs M1 injection site correlation;  $R^2 = 0.3055$  for  
230 S1 injection site correlation). In contrast, PT-type projections did not show this strong  
231 relationship (Fig. 5h-l and Supplementary Fig. 6;  $R^2 = 0.0038$  for striatal correlation vs M1  
232 injection site correlation;  $R^2 = 0.1219$  for S1 injection site correlation). Because IT-type  
233 corticostriatal projections generally project to a greater area in striatum (Fig. 3 and 4), it is  
234 possible the increased co-correlation resulted from IT-type projection overlap in a focal region  
235 not innervated by PT-type neurons. Thus, the relationship between anterior/posterior subsets of  
236 the striatum with corticocortical connectivity (measured as before) was assessed by examining



237 the co-correlation of cortical and striatal connectivity along 250  $\mu\text{m}$  striatal segments. This  
238 revealed a long plateau of high correlation across the rostrocaudal extent of striatum (Fig. 5j) for  
239 IT-type but not PT-type projections. The enhanced co-correlation for IT-type projects did not  
240 result from a single focal region, but was spread across the extent of the corticostriatal  
241 projection. Thus, interconnected cortical areas shared projection targets in basal ganglia, but  
242 this relationship was stronger for the IT-type subset of corticostriatal projections.

243

#### 244 **Single IT-type and PT-type axons show similar gross targeting but differences in** 245 **stereotypy and density of arborization.**

246 Mean projections were based on  $\sim 600$ -900 neurons per injection (IT-type injections  
247  $906.9 \pm 71.7$ , PT-type injections  $612.1 \pm 44.7$ , mean  $\pm$ sd). Examination of axonal arbors of single  
248 neurons shed light on how variable the projections of each population of pyramidal neurons  
249 might be. Single axons of IT- and PT-type cells in primary and secondary motor cortex were  
250 imaged and registered to the Allen Reference Atlas<sup>31</sup>. Although a limited number of total  
251 neurons were available, individual axons extended certain aspects of these findings. IT-type  
252 and PT-type neurons in the same area shared a similar topography, though IT-type arbors were  
253 more extensive and PT-type arbors were more focal (Fig. 6a-c). Comparison of multiple primary  
254 motor cortex (M1) projections confirmed that larger IT-type arbors have more overlap, while  
255 more focal PT-type projections were less likely to overlap. From the same area, PT-type axons  
256 innervated a subset of the region innervated by IT-type axons (Fig. 6d-f). The overall pattern of  
257 IT-type projections differed between M1 and M2 (Fig. 6g-i). M1 axonal projections targeted more  
258 discrete areas, with relatively nearby neurons maintaining somatotopic organization. In contrast,  
259 individual M2 axons projected more broadly within the striatum, resulting in considerable overlap  
260 and only a rough somatotopic organization. M2 projections were also stronger to contralateral  
261 striatum. Individual IT-type neurons in M1 and M2 showed considerable heterogeneity in terms  
262 of bilateral projections, with some neurons projecting axons primarily ipsilaterally, some  
263 contralaterally, and some bilaterally (cf. IT-type gold vs. red). Considerable variation between  
264 individual IT- and PT-type neurons suggested that further subclassification of these cell types is  
265 needed.

266

#### 267 **Striatum is loosely organized in somatotopic areas.**

268 IT-type and PT-type projection correlations were used to construct hierarchical  
269 relationships between cortical injection sites based on the projections to various brain regions.  
270 Pairwise correlation scores for IT-type outputs to ipsilateral striatum were used to construct a  
271 dendrogram using Euclidean distance between correlations as the distance measure. Generally,  
272 nearby injection sites showed the greatest affinity (Fig. 7a-c). At higher hierarchical levels, most  
273 fS1 and vS1 injections clustered together. Motor injections in vM1, fM1, lM1, and M2 also  
274 clustered together. Unexpectedly, orfS1 clustered with ALM, suggesting an affinity between  
275 lateral sensory and frontal areas in their projections to ipsilateral striatum. Of interest, this  
276 affinity also recurred in a similar analysis of corticocortical correlations (Supplementary Fig. 7).  
277 In contrast to the IT-type results, using the same methodology to examine PT-type corticostriatal  
278 outputs, sensory inputs clustered together, separately from motor and frontal inputs (Fig. 7d-f).

279 Differences in input contribute to differences in striatal function. Since corticostriatal  
280 inputs form a major excitatory input, differences in sensory, motor, and frontal corticostriatal  
281 projections could identify functionally distinct striatal regions. Average normalized projection  
282 patterns were determined from eight injection sites for two mouse lines. The normalized  
283 projection strength was used to assign ipsilateral striatal voxels into clusters using *k*-means  
284 clustering. Five clusters were found based on the peak silhouette value. These were presented  
285 in coronal section for the ipsilateral striatum using five colors (Fig. 8a). The fraction of output to

286 each of the clusters is shown for IT-type and PT-type projections (Fig. 8b-c). One cluster (blue)  
287 covered the anterior, medial, and posterior edges of the striatum, which were predominantly  
288 regions receiving poor output from sensorimotor cortex. The dorsolateral sector included (a) an  
289 anterior core region (green) that received substantial M2 and primary motor output, (b) an  
290 anterior dorsolateral region (olive) that received strong motor output and some sensory output,  
291 and (c) a posterior dorsolateral region (red) that received strong sensory output and some motor  
292 output. The ventral and posterior domain received input from ALM and orfS1. This analysis was  
293 repeated for IT-type projections alone and PT-type projections alone (Supplementary Fig. 8).  
294 Clustering based on IT-type input alone resulted in 4 clusters, with the anterior and posterior  
295 dorsolateral regions that were separable based on both projections combined into a single  
296 cluster when PT-type data was excluded. This shift highlighted a difference in the IT-type and  
297 PT-type projections: the primary motor projections favored the anterior (olive) dorsolateral  
298 cluster, while the primary sensory projections favored the posterior (red) dorsolateral cluster.  
299 This difference was more pronounced for PT-type than for IT-type. Thus, differences in PT-type  
300 projections identified putative functionally distinct regions of striatum. That these regions were  
301 divided by PT-type sensory and motor outputs is also consistent with the earlier dendrogram  
302 (Fig. 7). The clustering of IT-type outputs to contralateral striatum was similar to ipsilateral  
303 striatum, but not as well-defined. Three clusters were sufficient to describe contralateral  
304 projections (Supplementary Fig. 8). Consistent with this, the overall correlation coefficients were  
305 reduced for these projections (Supplementary Fig. 4). This implied a reduction in the  
306 topographic specificity of contralateral striatal projections.

307

308 (Word count: 2903. Main text limit 2000-4000)

309

## 310 Discussion

### 311 Corticocortical connectivity predicts corticostriatal convergence of output from specific 312 cell types.

313 How do the corticostriatal projections of PT-type and IT-type neurons differ? These  
314 results show that corticostriatal projections of interconnected cortical areas replicate their  
315 corticocortical connectivity by projecting to shared targets in the striatum<sup>3,4</sup> (Fig. 5). However,  
316 this model did not distinguish between cell type specific projections. Discriminating between IT-  
317 type afferents and PT-type collaterals revealed this model best describes IT-type projections.  
318 Differences in the corticostriatal topography of projections for specific cell types within a cortical  
319 region had not previously been predicted. The basis for this difference is not that the center of  
320 mass of these projections differs (Fig. 4). Instead, within nearby cortical sites, there is greater  
321 heterogeneity in the PT-type projection between animals, as well as between axonal projections  
322 of single cells, as seen in MouseLight (Fig. 6). Thus, PT-type output is more focal, but less  
323 stereotyped in its targeting, as evidenced by both population and single axon data. These  
324 differences have been difficult to appreciate with conventional tracing techniques, though  
325 overlapping projections in subcortical targets including thalamus have been effective as a  
326 measure of somatotopic alignment between cortical sites<sup>1</sup>. Fine afferents may be missed in the  
327 corticostriatal projection in the Golgi method<sup>32</sup> and tracers do not distinguish between cell  
328 types<sup>2,24</sup>. Thus, cell type-specific lines are advantageous for anatomical tracing since the long-  
329 range projections of different cell types are organized differently<sup>15</sup>.

330 The relative importance of IT-type and PT-type corticostriatal collaterals is unclear. Both  
331 cell types are significant in rodents, as seen here. PT-type collaterals are also present in  
332 primates<sup>33</sup>, but are less prominent<sup>13,34</sup>. These neuronal subtypes receive distinct inputs<sup>10</sup> and  
333 convey different classes of information to descending circuits<sup>13</sup>. Thus, these differences may  
334 contribute to functional specialization within the striatum. These quantitative measures would be

335 difficult to achieve with lower resolution alignment (>100  $\mu\text{m}$  voxels) or the scoring of axons as  
336 present or absent (reducing the bit depth of images), which may limit similar studies<sup>2,24,35</sup>.  
337 Inclusion of other subtypes of projections, such as L2/3 pyramidal neurons or thalamic inputs<sup>35</sup>,  
338 or further subdividing IT-type neurons (as is possible with MouseLight) may reveal more  
339 nuanced structure within the corticostriatal projection.

340

#### 341 **Differences in somatosensory and motor topography.**

342 The difference in correlation between nearby primary motor and somatosensory  
343 projections is remarkable. In comparing IT-type injections in S1 and M1, the highest correlations  
344 are found for nearby injections in S1 (Fig. 4). The higher correlation with steeper reduction as  
345 injection sites shifted apart is consistent with a greater topographic specificity in primary  
346 somatosensory areas. This is paralleled by functional data, where specific areas of S1 are  
347 highly specific for certain body regions such as barrel cortex, where individual barrels are  
348 specific for a single whisker<sup>25</sup>. In contrast, microstimulation data suggests that motor  
349 representations, while topographic, are also generally intermingled<sup>22,23,26,29,30,36,37</sup>. The basis of  
350 these somatotopic differences may derive from the fact that somatosensory cortical areas have  
351 a clearly defined input for a given cortical column, such as the primary thalamocortical afferent  
352 to layer 4, representing touch of a single finger or whisker<sup>38</sup>. In contrast, primary motor areas  
353 have less spatially restricted thalamic<sup>39</sup> and cortical<sup>40</sup> inputs. The neurons in these areas may  
354 represent a more diverse range of phenomena<sup>41</sup>, ranging from muscles<sup>42,43</sup> to movements<sup>44</sup> and  
355 behaviors<sup>45</sup>, where body representation alone is not sufficient. It is worth noting that the  
356 decrease of correlation with injection site offset is relatively linear instead of stepwise, though  
357 smaller steps in the noise are possible. This is consistent with a gradual shift in somatotopic  
358 representation of body regions in striatum instead of discrete segments dedicated exclusively to  
359 a single region<sup>2</sup>.

360 This relationship is also true between sensory and motor injections labeling PT-type  
361 neurons, but the overall level of correlation is lower. This was unexpected, as these projections,  
362 as collaterals of output targeting subcortical targets, were expected to be more precise. The  
363 enhanced correlation of IT-type neurons is not due to targeting of a specialized IT-specific  
364 striatal region or a substantial offset in the projection zones of the two cell types, as the center  
365 of mass of PT- and IT-type projection is similar across the anterior/posterior extent of the  
366 striatum (Fig. 4g-i). Instead, quantification of PT-type collaterals showed that these projections  
367 have fewer suprathreshold voxels and thus are more spatially limited (Fig. 3-4). Individual axon  
368 reconstructions, such as MouseLight data, show that striatal axons of IT neurons are more  
369 highly branched than those of PT neurons<sup>9</sup>. Therefore, individual PT-terminals are more focal  
370 (Fig. 6). But they also show less spatial overlap and higher variability within an injection site  
371 (Fig. 4) and between nearby cells (Fig. 6). This correlation is not simply due to a reduction in the  
372 volume of overlap, as comparisons between PT- and IT-type injections in nearby sites showed  
373 an increase in overlap volume, but relatively low correlations comparable to PT-PT correlations  
374 for the same injection site offset (Fig. 4). Thus, peak correlation is not simply driven by overlap  
375 volume.

376 Although there is strong evidence from primates<sup>4</sup> and rodents<sup>46</sup> for convergence of  
377 corticostriatal afferents from associated cortical areas, some data<sup>47</sup> suggests S1 and M1  
378 projections are largely non-overlapping. This result may differ from those presented here if the  
379 somatotopic alignment of the two sites is imprecise (Fig. 4 and 5). The dual channel recordings  
380 presented here (Supplementary Fig. 2) show synaptic convergence of S1 and M1 outputs for all  
381 SPNs recorded, demonstrating that integration of somatotopically aligned sensory and motor  
382 signals is a relatively frequent characteristic of striatal neurons.

383 Contralateral corticostriatal projections of IT-type neurons show reduced correlations  
384 compared to ipsilateral axons (Supplementary Fig. 4). Thus, the precision of axonal targeting  
385 varies across different collaterals of the same cell type. Since it would be possible to use the



386 same molecular and activity-dependent cues to achieve the same precision in ipsi- and  
387 contralateral connections, it will be interesting to learn the functional import of generating a  
388 contralateral projection with less spatial precision than the ipsilateral one. On the one hand,  
389 longer-range contralateral projections might lose some topographic precision, but how does the  
390 animal benefit from a less precise contralateral projection? Such inputs would seemingly  
391 degrade the precision of input to contralateral SPNs.

392 Notably, overall projection density differs across IT-type and PT-type neurons moving  
393 from frontal to motor and sensory areas (Fig. 4). In IT-type injections, frontal projections  
394 provided the densest striatal afferents (Fig. 3). In contrast, for PT-type injections, frontal  
395 injections were by contrast the weakest (Fig. 3 and 4). Thus, PT-type projections had a higher  
396 relative density of projections from sensory areas. This difference is useful in subdividing the  
397 striatum into sectors, where including both PT- and IT-type projection data helps differentiate  
398 anterior and posterior dorsolateral striatal areas specialized for motor and sensory input  
399 respectively (Fig. 8, clusters 3 and 5) which merge when IT-type only output is considered  
400 (Supplementary Fig. 8a).

401 Several sources may limit the stereotypy of corticostriatal projections. Relatively  
402 compact versus scattered injection sites did not show a large variation in corticostriatal  
403 correlations, suggesting that injection site size did not play a major role in variation between  
404 injections. Thus, animal-to-animal variation instead of injection variability may play a larger role  
405 in limiting the peak correlation. Other limitations include the spatial resolution of the alignment  
406 (~50-70  $\mu\text{m}$ ) and voxel size, which could reduce correlations by spatial averaging. Using higher  
407 resolution aligned images (10x10x10  $\mu\text{m}$  voxels) did not alter the linkages between injection  
408 sites (data not shown). That peak correlations are close to 0.6 suggests that animal-to-animal  
409 variation sets an upper limit on comparisons across brains. That peak correlations are not closer  
410 to 1.0 quantified the substantial inter-case variability and underscores the relevance of studying  
411 injections across cases in different animals instead of using a single injection case to assess  
412 typical projection targets in striatum.

413

#### 414 **Affinity of orofacial sensory and motor areas.**

415 Although frontal areas, such as ALM and M2, might be organized differently than sensory  
416 and primary motor cortex, it was interesting that IT-type projections from lateral regions of  
417 frontal cortex (ALM) projected to striatum similarly to those originating from orofacial regions of  
418 S1 anterior and lateral to barrel cortex. Of note, the corticocortical collaterals of ALM also  
419 projected posteriorly towards lateral regions of motor and somatosensory cortex. This was  
420 reciprocated by projections from orfS1 to ALM. Thus, ALM's corticocortical connectivity  
421 suggested a basis for corticostriatal overlap with orfS1 projections. Coincidentally, ALM has  
422 been identified as a low-threshold region for evoking tongue movement in rodents<sup>22,48,49</sup>. Based  
423 on this connectivity pattern, ALM and orfS1 are connected in a manner reminiscent of primary  
424 motor and sensory regions. ALM has also been implicated in more traditional frontal cortex  
425 functions such as motor planning in mice<sup>50,51</sup>.

426

#### 427 **Limitations of anatomical methods.**

428 A comprehensive study of differences in cortical cell type (IT- or PT-type) output to  
429 distinct striatal populations was not possible from all cortical areas to the range of striatal neuron  
430 populations, including direct and indirect SPNs as well as striatal interneuron populations.  
431 Targeting of afferents to distinct striatal compartments such as patch and matrix may also differ  
432 between different cortical areas, though average sensorimotor populations target both patch  
433 and matrix neurons in similar proportions<sup>52</sup>. Afferents from both IT- and PT-type cells form  
434 connections to direct and indirect pathway striatal projection neurons<sup>53</sup>. It not yet possible to  
435 evaluate, however, whether there is a bias in targeting from either PT- or IT-type output, as has  
436 been proposed<sup>54,55</sup>, because of quantitative limitations in circuit mapping methods. Retrograde

437 tracing with transgenic rabies suggests that sensory and motor inputs preferentially excite direct  
438 and indirect pathway SPNs respectively<sup>56</sup>, suggesting specific postsynaptic targeting of afferents  
439 is possible in striatum. Physiological data (Supplementary Fig. 2) shows that motor and sensory  
440 corticostriatal afferents converged on single SPNs (Supplementary Fig. 2), but did not  
441 quantitatively distinguish between the cell types targeted.

442 Layer-specific Cre-driver lines such as Tlx3\_PL56 and Sim1\_KJ18 lines may not  
443 collectively label all L5 pyramidal neurons. For example, in the L5 mouse line Rbp4\_KL100,  
444 some IT-type and PT-type neurons are labeled, but the overall labelling density leaves many  
445 cells of both classes unlabeled<sup>17</sup>. The density of PT-type and IT-type neurons in Sim1\_KJ18 and  
446 Tlx3\_PL56 lines varies over cortical areas, which suggests that some neurons may be missed in  
447 different regions. There may be underappreciated heterogeneity within these two L5  
448 populations, such as different subtypes of IT neurons for different targets<sup>57</sup>. Furthermore, in ALM  
449 injections of frontal cortex in Sim1\_KJ18 mice, some contralateral axonal projections are  
450 present. In other areas, such as midline cortical areas where lamination is less pronounced,  
451 transgenic reporters for these lines suggest changes in Cre expression, resulting in reduced  
452 Tlx3\_PL56 and Sim1\_KJ18 labeling<sup>17</sup>. Thus, use of transgenic approaches to target specific cell  
453 types is limited to the brain regions where these cell types are well-characterized.

#### 454 455 **Conclusion.**

456 The corticostriatal projection formed by two populations of L5 pyramidal neurons  
457 conveys distinct functional information with distinct striatal targeting. IT-type neurons in sensory  
458 and motor areas target somatotopically organized domains of striatum and also overlap  
459 substantially with other cortical areas with which they are reciprocally connected. PT-type  
460 neurons, in contrast, show less overlap with reciprocally connected cortical areas. This  
461 difference suggests that the measured degree of topographic organization depends in part on  
462 the cell type considered. As these cell types convey distinct information to striatum, it remains to  
463 be determined what purpose this differential targeting serves.

464  
465 (Word count: 1875)

466

## 467 References

- 468
- 469 1 Alloway, K. D., Mutcic, J. J., Hoffer, Z. S. & Hoover, J. E. Overlapping corticostriatal  
470 projections from the rodent vibrissal representations in primary and secondary  
471 somatosensory cortex. *J Comp Neurol* **428**, 51-67 (2000).
- 472 2 Hintiryan, H. *et al.* The mouse cortico-striatal projectome. *Nature neuroscience* **19**, 1100-  
473 1114 (2016).
- 474 3 Yeterian, E. H. & Van Hoesen, G. W. Cortico-striate projections in the rhesus monkey:  
475 the organization of certain cortico-caudate connections. *Brain Res* **139**, 43-63 (1978).
- 476 4 Alexander, G. E., DeLong, M. R. & Strick, P. L. Parallel organization of functionally  
477 segregated circuits linking basal ganglia and cortex. *Annu Rev Neurosci* **9**, 357-381  
478 (1986).
- 479 5 Yin, H. H. & Knowlton, B. J. The role of the basal ganglia in habit formation. *Nat Rev*  
480 *Neurosci* **7**, 464-476 (2006).
- 481 6 Gremel, C. M. & Costa, R. M. Orbitofrontal and striatal circuits dynamically encode the  
482 shift between goal-directed and habitual actions. *Nat Commun* **4**, 2264 (2013).
- 483 7 Voorn, P., Vanderschuren, L. J., Groenewegen, H. J., Robbins, T. W. & Pennartz, C. M.  
484 Putting a spin on the dorsal-ventral divide of the striatum. *Trends Neurosci* **27**, 468-474  
485 (2004).
- 486 8 Burton, A. C., Nakamura, K. & Roesch, M. R. From ventral-medial to dorsal-lateral  
487 striatum: neural correlates of reward-guided decision-making. *Neurobiol Learn Mem* **117**,  
488 51-59 (2015).
- 489 9 Cowan, R. L. & Wilson, C. J. Spontaneous firing pattern and axonal projections of single  
490 corticostriatal neurons in the rat medial agranular cortex. *J Neurophysiol.* **71**, 17-32  
491 (1994).
- 492 10 Shepherd, G. M. Corticostriatal connectivity and its role in disease. *Nat Rev Neurosci* **14**,  
493 278-291 (2013).
- 494 11 Kita, T. & Kita, H. The subthalamic nucleus is one of multiple innervation sites for long-  
495 range corticofugal axons: a single-axon tracing study in the rat. *J Neurosci* **32**, 5990-  
496 5999 (2012).
- 497 12 Kiritani, T., Wickersham, I. R., Seung, H. S. & Shepherd, G. M. Hierarchical connectivity  
498 and connection-specific dynamics in the corticospinal-corticostriatal microcircuit in  
499 mouse motor cortex. *J Neurosci* **32**, 4992-5001 (2012).
- 500 13 Turner, R. S. & DeLong, M. R. Corticostriatal activity in primary motor cortex of the  
501 macaque. *J Neurosci* **20**, 7096-7108 (2000).
- 502 14 Dong, H. W. *The Allen reference atlas: A digital color brain atlas of the C57Bl/6J male*  
503 *mouse*. (John Wiley, 2008).
- 504 15 Oh, S. W. *et al.* A mesoscale connectome of the mouse brain. *Nature* **508**, 207-214  
505 (2014).
- 506 16 Kuan, L. *et al.* Neuroinformatics of the Allen Mouse Brain Connectivity Atlas. *Methods*  
507 **73**, 4-17 (2015).
- 508 17 Gerfen, C. R., Paletzki, R. & Heintz, N. GENSAT BAC cre-recombinase driver lines to  
509 study the functional organization of cerebral cortical and basal ganglia circuits. *Neuron*  
510 **80**, 1368-1383 (2013).
- 511 18 Viswanathan, S. *et al.* High-performance probes for light and electron microscopy. *Nat*  
512 *Methods* **12**, 568-576 (2015).
- 513 19 Paletzki, R. & Gerfen, C. R. Whole Mouse Brain Image Reconstruction from Serial  
514 Coronal Sections Using FIJI (ImageJ). *Curr Protoc Neurosci* **73**, 1.25.1-21 (2015).
- 515 20 Anderson, C. T., Sheets, P. L., Kiritani, T. & Shepherd, G. M. Sublayer-specific  
516 microcircuits of corticospinal and corticostriatal neurons in motor cortex. *Nature*  
517 *neuroscience* **13**, 739-744 (2010).

- 518 21 Nudo, R. J. & Masterton, R. B. Descending pathways to the spinal cord, III: Sites of  
519 origin of the corticospinal tract. *The Journal of comparative neurology* **296**, 559-583  
520 (1990).
- 521 22 Hooks, B. M. *et al.* Laminar analysis of excitatory local circuits in vibrissal motor and  
522 sensory cortical areas. *PLoS Biol* **9**, e1000572 (2011).
- 523 23 Tennant, K. A. *et al.* The organization of the forelimb representation of the C57BL/6  
524 mouse motor cortex as defined by intracortical microstimulation and cytoarchitecture.  
525 *Cerebral cortex* **21**, 865-876 (2011).
- 526 24 Zingg, B. *et al.* Neural networks of the mouse neocortex. *Cell* **156**, 1096-1111 (2014).
- 527 25 Woolsey, T. A. & Van der Loos, H. The structural organization of layer IV in the  
528 somatosensory region (SI) of mouse cerebral cortex. The description of a cortical field  
529 composed of discrete cytoarchitectonic units. *Brain Res* **17**, 205-242 (1970).
- 530 26 Brecht, M. *et al.* Organization of rat vibrissa motor cortex and adjacent areas according  
531 to cytoarchitectonics, microstimulation, and intracellular stimulation of identified cells. *J*  
532 *Comp Neurol* **479**, 360-373 (2004).
- 533 27 Hooks, B. M., Lin, J. Y., Guo, C. & Svoboda, K. Dual-Channel Circuit Mapping Reveals  
534 Sensorimotor Convergence in the Primary Motor Cortex. *J Neurosci* **35**, 4418-4426  
535 (2015).
- 536 28 Penfield, W. & Rasmussen, T. *The Cerebral Cortex of Man: A Clinical Study of*  
537 *Localization of Function.* (Macmillan, 1950).
- 538 29 Rathelot, J. A. & Strick, P. L. Muscle representation in the macaque motor cortex: an  
539 anatomical perspective. *Proc Natl Acad Sci U S A* **103**, 8257-8262 (2006).
- 540 30 Ayling, O. G., Harrison, T. C., Boyd, J. D., Goroshkov, A. & Murphy, T. H. Automated  
541 light-based mapping of motor cortex by photoactivation of channelrhodopsin-2  
542 transgenic mice. *Nat Methods* **6**, 219-224 (2009).
- 543 31 Economo, M. N. *et al.* A platform for brain-wide imaging and reconstruction of individual  
544 neurons. *Elife* **5**, doi:10.7554/eLife.10566 (2016).
- 545 32 Cajal, S. R. y. *Histology of the Nervous System.* (Oxford, 1995).
- 546 33 Parent, M. & Parent, A. Single-axon tracing study of corticostriatal projections arising  
547 from primary motor cortex in primates. *J Comp Neurol* **496**, 202-213 (2006).
- 548 34 Bauswein, E., Fromm, C. & Preuss, A. Corticostriatal cells in comparison with pyramidal  
549 tract neurons: contrasting properties in the behaving monkey. *Brain research* **493**, 198-  
550 203 (1989).
- 551 35 Hunnicutt, B. J. *et al.* A comprehensive excitatory input map of the striatum reveals novel  
552 functional organization. *Elife* **5**, doi:10.7554/eLife.19103 (2016).
- 553 36 Penfield, W. & Jasper, H. H. *Epilepsy and the Functional Anatomy of the Human Brain.*  
554 (Little, Brown, 1954).
- 555 37 Rathelot, J. A. & Strick, P. L. Subdivisions of primary motor cortex based on cortico-  
556 motoneuronal cells. *Proc Natl Acad Sci U S A* **106**, 918-923 (2009).
- 557 38 Jensen, K. F. & Killackey, H. P. Terminal arbors of axons projecting to the  
558 somatosensory cortex of the adult rat. I. The normal morphology of specific  
559 thalamocortical afferents. *J Neurosci* **7**, 3529-3543 (1987).
- 560 39 Kuramoto, E. *et al.* Two types of thalamocortical projections from the motor thalamic  
561 nuclei of the rat: a single neuron-tracing study using viral vectors. *Cerebral cortex* **19**,  
562 2065-2077 (2009).
- 563 40 Hooks, B. M. *et al.* Organization of cortical and thalamic input to pyramidal neurons in  
564 mouse motor cortex. *J Neurosci* **33**, 748-760 (2013).
- 565 41 Huber, D. *et al.* Multiple dynamic representations in the motor cortex during  
566 sensorimotor learning. *Nature* **484**, 473-478 (2012).
- 567 42 Evarts, E. V. Relation of pyramidal tract activity to force exerted during voluntary  
568 movement. *J Neurophysiol* **31**, 14-27 (1968).



569 43 Todorov, E. Direct cortical control of muscle activation in voluntary arm movements: a  
570 model. *Nature neuroscience* **3**, 391-398 (2000).

571 44 Georgopoulos, A. P., Schwartz, A. B. & Kettner, R. E. Neuronal population coding of  
572 movement direction. *Science* **233**, 1416-1419 (1986).

573 45 Graziano, M. S., Taylor, C. S. & Moore, T. Complex movements evoked by  
574 microstimulation of precentral cortex. *Neuron* **34**, 841-851 (2002).

575 46 Hoffer, Z. S. & Alloway, K. D. Organization of corticostriatal projections from the vibrissal  
576 representations in the primary motor and somatosensory cortical areas of rodents. *J*  
577 *Comp Neurol* **439**, 87-103 (2001).

578 47 Pan, W. X., Mao, T. & Dudman, J. T. Inputs to the dorsal striatum of the mouse reflect  
579 the parallel circuit architecture of the forebrain. *Front Neuroanat* **4**, 147 (2010).

580 48 Li, C. X. & Waters, R. S. Organization of the mouse motor cortex studied by retrograde  
581 tracing and intracortical microstimulation (ICMS) mapping. *Can J Neurol Sci* **18**, 28-38  
582 (1991).

583 49 Komiyama, T. *et al.* Learning-related fine-scale specificity imaged in motor cortex circuits  
584 of behaving mice. *Nature* **464**, 1182-1186 (2010).

585 50 Li, N., Chen, T. W., Guo, Z. V., Gerfen, C. R. & Svoboda, K. A motor cortex circuit for  
586 motor planning and movement. *Nature* **519**, 51-56 (2015).

587 51 Guo, Z. V. *et al.* Flow of cortical activity underlying a tactile decision in mice. *Neuron* **81**,  
588 179-194 (2014).

589 52 Smith, J. B. *et al.* Genetic-Based Dissection Unveils the Inputs and Outputs of Striatal  
590 Patch and Matrix Compartments. *Neuron* **91**, 1069-1084 (2016).

591 53 Kress, G. J. *et al.* Convergent cortical innervation of striatal projection neurons. *Nature*  
592 *neuroscience* **16**, 665-667 (2013).

593 54 Lei, W., Jiao, Y., Del Mar, N. & Reiner, A. Evidence for differential cortical input to direct  
594 pathway versus indirect pathway striatal projection neurons in rats. *J Neurosci* **24**, 8289-  
595 8299 (2004).

596 55 Reiner, A., Hart, N. M., Lei, W. & Deng, Y. Corticostriatal projection neurons -  
597 dichotomous types and dichotomous functions. *Front Neuroanat* **4**, 142 (2010).

598 56 Wall, N. R., De La Parra, M., Callaway, E. M. & Kreitzer, A. C. Differential innervation of  
599 direct- and indirect-pathway striatal projection neurons. *Neuron* **79**, 347-360 (2013).

600 57 Chen, J. L., Carta, S., Soldado-Magraner, J., Schneider, B. L. & Helmchen, F.  
601 Behaviour-dependent recruitment of long-range projection neurons in somatosensory  
602 cortex. *Nature* **499**, 336-340 (2013).

603

604 **Acknowledgements**

605 We thank David Robbe, Taehyeon Kim, Sandra Okoro, YingXin Zhang-Hooks, and Peter Strick  
606 for insightful comments on the figures and manuscript. We thank Jack Glaser, Paul Angstman,  
607 Nate O'Connor, Sue Tappan, Mike Fay and Scott Gerfen at MBF Bioscience for the  
608 collaboration to develop and use the BrainMaker software. This work was supported by a  
609 NARSAD Young Investigator Award to BMH and by NINDS/NIH (R01 NS103993).

610

611 **Author contributions**

612 BMH, AEP, BSE, and CRG wrote analysis software needed to quantify the data. BE developed  
613 the BrainMaker software at MBF Bioscience to align the whole brain. RP performed all  
614 anatomical work for sectioning, immunostaining, and imaging. MF quantified soma locations for  
615 all injections. JJC performed all recordings in striatum for the dual channel photostimulation  
616 experiment. JW and JC produced single axon reconstructions with the MouseLight project at  
617 Janelia Research Campus. BMH and CRG conceived of the project, analyzed the data, and  
618 wrote the paper with contributions from all authors.

619

620 **Competing interests**

621 BSE is an employee of MBF Bioscience, which produces Neurolucida and BrainMaker software.  
622 The authors declare no other competing financial interests.

## 623 **Figure Legends**

624

### 625 **Figure 1 | Cre-driver lines label specific pyramidal neuron cell types**

626 (a, b) Example coronal images at the injection site of Tlx3\_PL56 (a, labeled L5-IT) and  
627 Sim1\_KJ18 (b, labeled L5-PT) in vM1, fM1, and S1 to show soma location. Scale bars, 0.5 mm.  
628 All images pseudocolored green for comparison. (c) Quantification of soma location of  
629 Sim1\_KJ18 mice injected in vM1, fM1, and S1. Comparison across regions shown at right. N  
630 indicated shows # of sections (# of mice) quantified. Purple, vM1; burgundy, fM1; teal, vS1. Pia  
631 is at relative laminar depth of 0; white matter is at 1. Black dashed lines represent individual  
632 sections with each section normalized to 1. Red tick marks show estimated laminar borders for  
633 cortical layers. (d) Mean neuron distribution for four lines labeling L2/3 (Sepw1\_NP39), L5-IT  
634 (Tlx3\_PL56), L5-PT (Sim1\_KJ18), and L6 (Ntsr1\_GN220) in three cortical areas. (e) Different  
635 targets of IT-type (Tlx3\_PL56) and PT-type (Sim1\_KJ18) neurons, illustrated with single axon  
636 reconstructions: IT-type neurons (blue) project to ipsi- and contralateral cortex (Ctx) and  
637 striatum (Str), while PT-type neurons (gold) target ipsilateral cortex and striatum, as well as  
638 subcortical targets in thalamus (Thal), superior colliculus (SC) and brainstem. (f-h) Low and high  
639 magnification images in NeuroLucida of an injection site in a Sim1\_KJ18 mouse. White box in (f)  
640 indicates magnified area (g and h). Scale bars 0.5 mm. (h) Annotation of somata at injection site  
641 in NeuroLucida. Blue circles (for red injection) indicate AAV-infected cell bodies expressing  
642 smFPs. (i and j) Coordinates of somata from NeuroLucida and fiducial markers placed along the  
643 pial surface of cortex and white matter were aligned to the CCF using the same coordinate  
644 transform as for the structure channel of the given brain. The somata for three injections (teal,  
645 burgundy, and purple) and fiducial markers (gray) were then plotted in 3-d (axes as indicated,  
646 with 1 mm scale bar, coronal viewpoint). This projection was rotated (j) for a dorsal view  
647 showing the center of mass (teal) for the burgundy injection and the anterior/posterior spread of  
648 infected somata. (k) Center of mass of Tlx3\_PL56 (N=92, circles) and Sim1\_KJ18 (N= 62,  
649 triangles) injections plotted in the CCF and spatially clustered. Eight clusters are shown in red  
650 (M2), orange (ALM), purple (vM1), burgundy (fM1), green (lIM1), yellow (fS1), teal (vS1), and  
651 gray (orfS1). Indeterminate injection sites are in black. Sites are superimposed on an image of  
652 the dorsal surface of mouse cortex. Black cross marks midline and bregma.

653

### 654 **Figure 2 | Computation of correlation for projections to ipsilateral striatum**

655 (a) Correlation for two injections (red and green channels) in a given structure (striatum,  
656 illustrated) is computed based on voxels where both channels are suprathreshold. (b) For three  
657 example Tlx3\_PL56 (IT-type) mouse injections in vM1, vS1, and ALM, scatterplot of all voxel  
658 intensities (8-bit imaging; arbitrary units) in ipsilateral striatum for two injections. Blank space  
659 between axis and points indicates threshold. Individual points in dark blue; multiple points  
660 increase yellow intensity. (c-d) Example coronal images from aligned brains in corresponding  
661 planes showing arborization of IT-type axons in ipsilateral striatum. vS1 shown in green, vM1 in  
662 blue, and ALM in red. (e) Correlation coefficient as a function of anterior/posterior plane in  
663 ipsilateral striatum for pairwise comparisons between three example injections. Correlation is  
664 noisy at anterior and posterior poles of striatum due to small voxel numbers in those planes. (f)  
665 Population mean correlation coefficient as a function of anterior/posterior plane in ipsilateral  
666 striatum for pairwise comparisons (the mean correlation for each vS1 compared to each vM1 in  
667 black, for example). vS1 and vM1 comparison, N=340 injection pairs; vS1 and ALM comparison,  
668 N=204; vM1 and ALM comparison, N=240.

669

670 **Figure 3 | Topography of sensory, motor, and frontal corticostriatal projections from IT-**  
671 **type and PT-type neurons**  
672 (a) Images of average corticostriatal projections from IT-type neurons. Rows represent images  
673 at five coronal planes from anterior (+1.25 mm to bregma) to posterior (-1.75 mm to bregma). A  
674 dashed white line outlines ipsilateral striatum. Scale bar, 1 mm (top panel). Voxels are  
675 50x50x50  $\mu\text{m}$ . Columns represent the eight injection site clusters, organized into sensory (vS1,  
676 orfS1, and fS1), motor (vM1, fM1, lM1), and frontal (ALM and M2) modalities. Black and white  
677 images show average normalized projections for a given injection site cluster. For comparison,  
678 these are color coded and presented together at the right to show within-modality topography.  
679 For example, vS1 projections in red are generally more dorsal and orfS1 in green are generally  
680 more ventral. (b) Average normalized sensory (red), motor (green), and frontal (blue) projections  
681 are shown to illustrate topography across modalities. (c) Mean voxel intensity along the  
682 anterior/posterior axis of ipsilateral striatum. Scale bar, 1 mm; each plane is 50  $\mu\text{m}$ . Each  
683 injection site cluster is color coded after Fig. 1. (d) Within cluster comparisons show high  
684 correlation for nearby injections in the same cluster. The sensory plot shows mean correlation  
685 for a given vS1 injection compared to other vS1 injections. Two colors are used (left, teal; right,  
686 blue) with the right-hand color indicating locations along the anterior/posterior axis where  
687 correlation coefficient is significantly different from shuffled data ( $p < 0.001$ , rank sum test).  
688 Legend for all comparisons shows two colors for each injection site cluster (right color,  
689 significant differences). Similar comparison performed for all eight clusters. Comparisons made  
690 in planes for injections where both share  $>100$  suprathreshold voxels. (e) Across cluster  
691 comparisons compare injections within the same modality. For sensory clusters, vS1 injections  
692 are compared to orfS1 (green) and fS1 (yellow), and orfS1 injections are compared to fS1 (blue).  
693 Across cluster comparisons are also compared for motor (center) and frontal (right) injections.  
694 (f) Mean correlations within (vS1-vS1) and across (vS1-orfS1, etc.) ipsilateral corticostriatal  
695 projections from IT-type pyramidal neurons. Correlations within a given injection cluster are  
696 greater than correlations across functionally similar nearby clusters. (g-l) Images and analysis  
697 for PT-type projections, presented as for IT-type projections.

698  
699 **Figure 4 | Somatotopic precision across the corticostriatal projectome compared across**  
700 **cortical areas and cell types**

701 (a,b) Pairwise correlation between projections to ipsilateral striatum from IT-type (a-b) and PT-  
702 type (c-d) pyramidal neurons was determined and plotted against injection site offset in mm. (a,  
703 c) Dorsal view of injection sites in CCF coordinates. Midline and bregma indicated at right.  
704 Scale bars, 1 mm. All primary sensory (S1) injections are shown in blue and primary motor  
705 (M1) injections are shown in pink. Circles indicate injection site with injection number labeled.  
706 Double headed arrow indicates injection site offset distance for one pair of injections. (b, d, f)  
707 Correlation versus injection site offset for S1 and M1 injections. Solid line represents linear fit,  
708 with confidence interval plotted as dashed lines. Typographic marks indicate y-intercept across  
709 panels for comparison. (e) Mean number of overlapping voxels used to calculate correlations for  
710 IT-IT (b), PT-PT (d), and IT-PT (f) comparisons. (f) Correlation versus injection site offset for  
711 comparisons across IT-type and PT-type injections in S1 and M1. Here, each S1 IT-type  
712 injection is compared to each S1 PT-type injection but not to other IT-type injections. (g) The  
713 anterior/posterior location of suprathreshold voxels in ipsilateral striatum was quantified for all  
714 individual IT-type and PT-type injection cases. Individual cases are shown as thin dashed lines,  
715 while thicker lines represent the mean. IT-type projections are highlighted in color  
716 corresponding to their injection cluster (for example, vS1 is teal) while the corresponding PT-



717 type projections from the same cluster are plotted in black on the same axes for comparison.  
718 Number of suprathreshold voxels is similar for vS1, orfS1, and fS1 injections. Suprathreshold  
719 voxels for IT-type projections from frontal areas ALM and M2 exceed those of PT-type  
720 projections. (h) Peak normalized distribution of both IT-type and PT-type projections are shown.  
721 These peak at similar points on the anterior/posterior axis. (i) To assess differences in targeting  
722 of IT-type and PT-type projections within the same injection site cluster, the center of mass of  
723 the voxels for the mean normalized injection pattern was calculated for each injection site  
724 cluster. The overall center of mass is shown as a large circle (red and green circles, example at  
725 left). The center of mass of each coronal plane is also plotted as a circle, and projections along  
726 the x-, y-, and z-axes are shown. The size of the circle is proportional to the summed  
727 normalized voxel intensity for a given plane. For the example projection at bottom, red (vS1 IT-  
728 type projection) and green (vS1 PT-type projection). The anterior/posterior projections for each  
729 injection cluster are shown above. The color code corresponds to the injection site cluster (teal  
730 for vS1), with PL56 injections shown in color and corresponding PT-type projections shown in  
731 black. Dotted line is shown for anterior/posterior alignment across injection clusters. Center of  
732 mass of vS1, orfS1, and fS1 (teal, gray, and gold, respectively) are posterior within the striatum,  
733 while frontal areas ALM and M2 (orange and red) are anterior. The overall center of mass of  
734 projections overlaps for IT- and PT-type cases, resulting in overlap of these markers.  
735

### 736 **Figure 5 | Corticostriatal projections map the organization of corticocortical connectivity** 737 **in IT-type but not PT-type projections**

738 (a) Sensory and motor cortex injections make reciprocal intracortical projections between  
739 somatotopically related areas. (b, c, f, g) IT-type injection examples shown contrast a pair of  
740 strongly connected cortical areas (red vS1 and yellow vM1 injections) with a non-  
741 somatotopically aligned area (green fM1 injection). vS1 axons (red) overlap poorly with fM1  
742 neurons (green). These are poorly correlated in both injection sites (-0.1845 and 0.0644; b, c  
743 top and bottom) as well as the striatum (-0.0116; b, c middle). In contrast, vS1 axons (red)  
744 overlap well with vM1 neurons (yellow) and are strongly correlated in both injection sites (0.4028  
745 and 0.3495; f, g top and bottom) as well as the striatum (0.4375; f, g middle). (d,e) Scatterplot of  
746 co-correlations of corticocortical connectivity (using injection site overlap) and corticostriatal  
747 connectivity for IT-type projections. Each individual point represents the corticostriatal  
748 correlations (x-axis) and injection site correlation (y-axis) for a single pair of injections with  
749 corticocortical correlation computed at either M1 (d) or S1 injection sites (e). Red points on the  
750 scatterplot compare sensory and motor injections. Black points add comparisons to frontal  
751 areas (M2 and ALM). Teal arrows and points indicate specific points corresponding to the  
752 example injections shown. (h,i) Scatterplot of co-correlations of corticocortical connectivity and  
753 corticostriatal connectivity for PT-type projections. (j) Co-correlations of corticocortical  
754 connectivity and corticostriatal connectivity are re-assessed, with corticostriatal correlations (y-  
755 axis) calculated using subsets of striatal voxels along the anterior/posterior axis in 250  $\mu$ m  
756 segments (x-axis, in mm). Co-correlation is plotted for IT-type (red) and PT-type (blue)  
757 injections.  
758

### 759 **Figure 6 | Single neuron reconstructions of IT-type and PT-type neurons in motor areas**

760 (a) Reconstruction of the long-range axonal projections of adjacent PT-type (blue) and IT-type  
761 (gold) L5 pyramidal neurons<sup>31</sup>. Projections throughout the whole CNS anterior to medulla are  
762 shown in the reference atlas (CCF) coordinates, with annotated regions shown in gray. (b)  
763 Somata are in adjacent in primary motor cortex (M1). (c) Corticostriatal projections show similar

764 general topography with differences in arbor size and density. (d) Five adjacent IT-type (red,  
765 teal, and gold) and PT-type (green and white) M1 neurons. (e,f) Corticostriatal projections show  
766 topography of IT-type and PT-type projections, as well as differences in density, terminal field  
767 size, and asymmetry of projections to contralateral striatum. White box in (e) magnified in (f). (g-  
768 i) Five adjacent IT-type (purple, teal, and blue) and PT-type (green and off-white) secondary  
769 motor cortex (M2) neurons.

770

### 771 **Figure 7 | Hierarchical clustering of IT-type and PT-type corticostriatal projections**

772 (a) Pairwise correlation scores for all IT-type projections studied (N=92). High correlation, red  
773 (with perfect correlation along the main diagonal). Negative correlation, blue. (b) Injections were  
774 hierarchically clustered using correlation score as the distance measure. Individual injections at  
775 the tips of the dendrogram were color-coded according to the injection site location cluster to  
776 which they were assigned. (c) Using a dorsal view of the brain (with bregma marked at right;  
777 scale bars, 1 mm), the dendrogram from (b) was plotted using the center of mass of the  
778 injection site as the point for the tip of the tree. (d-f) Pairwise correlation scores and  
779 dendrograms for all PT-type projections studied (N=62), plotted as for IT-type projections.

780

### 781 **Figure 8 | Major divisions of ipsilateral striatum based on sensory and motor cortical 782 projections**

783 (a) *k*-means clustering of striatal pixels based on mean normalized fluorescence intensity from  
784 each of the eight injection site clusters for both IT-type and PT-type pyramidal neurons. The  
785 striatal clusters are illustrated as five colors (legend, at bottom) in evenly spaced planes every  
786 0.25 mm from anterior (top left) to posterior (bottom right). Scale bar, 1 mm. (b) The fraction of  
787 the output from each of the eight injection site clusters to a given striatal division from IT-type  
788 projections. Graphs are divided into sensory (left), motor (center), and frontal (right), with all  
789 areas together at far right. (c) The fraction of the output from each of the eight injection site  
790 clusters to a given striatal division from PT-type projections, presented as in (b). (d) A  
791 comparison of the striatal divisions based on *k*-means clustering (left) to the pattern of  
792 normalized sensory (red), motor (green), and frontal projections (blue), presented as an RGB  
793 image (right).

794

## 795 **Online Methods**

### 796 **Injections.**

797 All breeding, surgical, and experimental procedures conformed to National Institutes of  
798 Health guidelines for mice and were approved by the Institutional Animal Care and Use  
799 Committees of University of Pittsburgh and Janelia Research Campus. Mice from four GENSAT  
800 BAC Cre-recombinase driver lines (Sepw1\_NP39, N=7; Tlx3\_PL56, N=33; Sim1\_KJ18, N=22;  
801 and Ntsr1\_GN220, N=5)<sup>17</sup> were used to trace the projections of four populations of cortical  
802 pyramidal neurons. Mice of both sexes were injected at postnatal day P37.0±1.7 (mean ± se)  
803 and sacrificed after 2-3 weeks of expression. Stereotaxic injections were performed as  
804 previously described<sup>40</sup>, with all injections in the same hemisphere. Injection sites covered a  
805 range of somatotopic locations in primary somatosensory cortex and corresponding areas of  
806 motor and frontal cortex<sup>22-24</sup>. 30 nL per injection site of AAV-flex-XFPs were injected using a  
807 custom positive displacement injector via a pulled borosilicate glass micropipette. The generic  
808 AAV-flex-XFP refers to several tracing viruses used, including AAV2/1-CAG-flex-EGFP,  
809 AAV2/1-CAG-flex-tdTomato, and the GFP- and mRuby2-based spaghetti monster fluorescent  
810 proteins (smFPs) smFP-FLAG, smFP-Myc, smFP-V5, smFP-HA, Ruby2-FLAG, and Ruby2-  
811 OLLAS (Table 1)<sup>18</sup>. Injections were made into cortex (at 300-1100 µm depth). For injections into  
812 L5 and L6, virus was injected at two depths. Laminar specificity was achieved by Cre-  
813 recombinase instead of injection depth. Typically, three sites were injected per mouse. In some  
814 cases, fewer channels were quantified if expression was not usable in a given channel due to  
815 weak expression or marked spread of the virus away from the injection site.

816

### 817 **Histology, staining, and imaging.**

818 Mice were transcardially perfused with 4% paraformaldehyde in phosphate-buffered  
819 saline and postfixed overnight. Brains were then transferred to 20% sucrose in PBS for storage.  
820 Brains were sectioned at 80 µm and signal was immunoamplified. 1:100 dilution of Neurotrace  
821 Blue was used as a structural marker<sup>19</sup>. Sections were then imaged using NeuroLucida (v2017,  
822 MBF Bioscience, Williston, VT) on a Zeiss Axioimager (Zeiss, Oberkochen, Germany) equipped  
823 with 10x objective, Ludl motorized stage and a Hamamatsu Orca Flash 4.0 camera  
824 (Hamamatsu, Hamamatsu City, Japan). Each section was comprised of an average of ~100-  
825 200 image stacks collected in 10 µm steps. A single 3D image was first generated then a  
826 deeper field-of-view was achieved by collapsing images to a single plane using a DeepFocus  
827 algorithm<sup>17,19</sup> (**Supplementary Fig. 1b-e**) implemented in NeuroLucida. Original images are  
828 available at: <http://gerfenc.biolumida.net/link?l=Jl1tV7>

829

### 830 **Whole brain reconstruction, image annotation, and registration.**

831 Tiled images were aligned to a standard coordinate system using BrainMaker software  
832 (MBF Bioscience, Williston, VT). Resulting serially-reconstructed brains contained 10 µm  
833 isotropic voxels (782x1086x1242) and were registered to the annotated Allen Mouse Common  
834 Coordinate Framework (CCF), Version 3 (<http://connectivity.brain-map.org>)<sup>14-16</sup>. All brains were  
835 registered to this framework using Neurotrace Blue images as the structural marker and a two-  
836 stage registration process. The first stage constructed an average reference space that provides  
837 a representation of the average appearance of brains that have undergone histological  
838 sectioning, mounting, and staining specific to this study and in the same image modality (i.e.  
839 Neurotrace Blue). Registration of individual brains to this average reference space was found to  
840 be more robust than direct multimodal registration to the Allen CCF reference image.

841 The average reference image was constructed from 78 individual 3D brains in a manner  
842 similar to the Allen CCF, which incorporates 1675 individual brains with cytoarchitecture

843 visualized with 2-photon auto-fluorescence<sup>16</sup>. In this study, the counterstain (Neurotrace Blue)  
844 channel for each individual brain was registered to a reference template, initialized as one of the  
845 individual brains resampled with a uniform voxel spacing. Multiple resolution registration  
846 optimized the 12 parameters of a 3D affine transform to minimize a normalized correlation  
847 metric between each brain and the template image. The reference template was then updated  
848 by resampling all individual brains with their respective affine transforms and computing a voxel-  
849 wise weighted average. Voxels that received a small number of contributions were discarded to  
850 correct for some tissue damage present in individual brains. A second pass registered each  
851 individual brain to the new template, updating the individual transforms. This process repeated  
852 until the template image stabilized.

853 The second stage involved registering the average reference image to the Allen CCF.  
854 300 unique landmark points were identified in the average reference image and corresponding  
855 points in the Allen CCF 2-photon reference image. The positions of the landmark  
856 correspondences were used to construct a nonlinear transform that models deformation of a  
857 uniform mesh grid with B-splines. This transform was used to resample the Allen CCF  
858 annotation volume in the average reference image using nearest neighbor interpolation. The  
859 result, an average reference image and its spatially aligned annotation volume, constitutes the  
860 average reference atlas. The counterstain channel of individual brains in this study were  
861 registered with the average reference space by adjusting parameters of a 3D affine and 3D  
862 nonlinear B-spline transform to minimize a normalized correlation metric. Some but not all  
863 individual brains contributed to the average reference space. Measurement of alignment  
864 precision showed this was accurate to ~50-70  $\mu\text{m}$  (Supplementary Fig. 11-y). Comparable  
865 studies use alignment methodologies with less precision (~100  $\mu\text{m}$ ), larger voxels (100-150  $\mu\text{m}$   
866 per side)<sup>35</sup> or images reduced from 8-bit to 2-bit (“dense/strong”, “moderate”, “diffuse/light”,  
867 etc.)<sup>2,24</sup>.

868 The recovered transform was used to map the locations of fluorescence and cell soma  
869 locations detected on fluorescent tracer channels. For quantification of injection site location,  
870 tiled images were imported into NeuroLucida software (MBF Bioscience, Williston, VT) and soma  
871 locations were annotated using automated object detection with manual supervision. Nearest  
872 neighbor interpolation of the average reference space volume at the mapped positions provided  
873 the anatomical region assignment for each cell. Coordinates of the CCF for structures of interest  
874 (such as striatum) were used to identify voxels for quantification. These were divided into left  
875 and right hemispheres to distinguish between structures ipsilateral and contralateral to the  
876 injection site.

877

#### 878 **Data analysis.**

879 Aligned brain images were downsampled to 50  $\mu\text{m}$  isotropic voxels (156x217x248) using  
880 custom routines in FIJI software<sup>58</sup>. The annotated Allen Mouse CCF was also used at 10  $\mu\text{m}$   
881 and downsampled to 50  $\mu\text{m}$ . The annotation was used to assign voxels to a given brain region  
882 (ipsilateral or contralateral striatum, for example). Both 10  $\mu\text{m}$  and 50  $\mu\text{m}$  images were  
883 converted from tifs into .mat files in Matlab (Mathworks, Natick, MA) for analysis with custom  
884 routines. Soma locations were similarly imported to Matlab.

885

#### 886 **Life Sciences Reporting Summary.**

887 Further information on experimental design is available in the Life Science Reporting Summary.

888

#### 889 **Data availability statement.**

890 The data that support the findings of this study are available from the corresponding authors  
891 upon request. Aligned images in 10 and 50  $\mu\text{m}$  voxels for all brains, cell soma locations, and the



892 corresponding masks used to identify brain regions (striatum, for example) are available on  
893 request. Custom Matlab code for data analysis is available on request. Original images of whole  
894 brains are freely available online at: <http://gerfenc.biolucida.net/link?l=Jl1tV7>.

895 58 Schindelin, J. *et al.* Fiji: an open-source platform for biological-image analysis. *Nat*  
896 *Methods* **9**, 676-682 (2012).

897

898

899

900 **Table 1 | Constructs for Tracing (Online Methods)**

901

| <b>Construct name</b>            | <b>Addgene number</b> | <b>Addgene name</b>     | <b>Penn Vector Core number</b> | <b>Penn Vector Core name</b>    |
|----------------------------------|-----------------------|-------------------------|--------------------------------|---------------------------------|
| AAV2/1-CAG-flex-EGFP             | 51502                 | pCAG-FLEX-EGFP-WPRE     | AV-1-ALL854                    | AAV1.CAG.Flex.eGFP.WPRE.bGH     |
| AAV2/1-CAG-flex-tdTomato         | 51503                 | pCAG-FLEX-tdTomato-WPRE | AV-1-ALL864                    | AAV1.CAG.Flex.tdTomato.WPRE.bGH |
| AAV2/1-CAG-flex-GFPsmFP-FLAG     | 59756                 | pCAG-smFP-FLAG          | -                              | -                               |
| AAV2/1-CAG-flex-GFPsmFP-Myc      | 59757                 | pCAG-smFP-Myc           | AV-1-PV3511                    | AAV1.CAG.GFPsm-myc.WPRE.SV40    |
| AAV2/1-CAG-flex-GFPsmFP-V5       | 59758                 | pCAG-smFP-V5            | -                              | -                               |
| AAV2/1-CAG-flex-GFPsmFP-HA       | 59759                 | pCAG-smFP-HA            | -                              | -                               |
| AAV2/1-CAG-flex-mRuby2smFP-FLAG  | 59760                 | pCAG-mRuby2-smFP-FLAG   | AV-1-PV3509                    | AAV1.CAG.Ruby2sm-FLAG.WPRE.SV40 |
| AAV2/1-CAG-flex-mRuby2smFP-OLLAS | 59761                 | pCAG-mRuby2-smFP-OLLAS  | -                              | -                               |

902

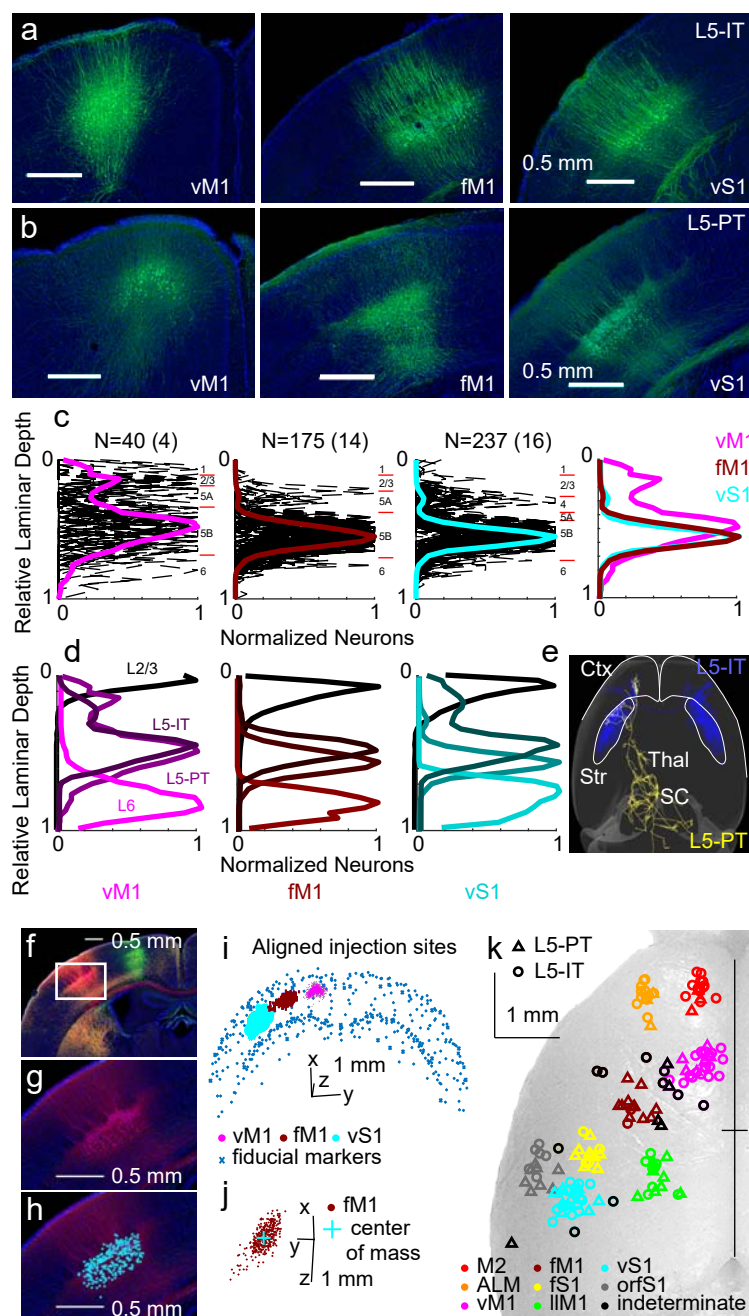

**Figure 1 | Cre-driver lines label specific pyramidal neuron cell types**

(a, b) Example coronal images at the injection site of Tlx3\_PL56 (a, labeled L5-IT) and Sim1\_KJ18 (b, labeled L5-PT) in vM1, fM1, and S1 to show soma location. Scale bars, 0.5 mm. All images pseudocolored green for comparison. (c) Quantification of soma location of Sim1\_KJ18 mice injected in vM1, fM1, and S1. Comparison across regions shown at right. N indicated shows # of sections (# of mice) quantified. Purple, vM1; burgundy, fM1; teal, vS1. Pia is at relative laminar depth of 0; white matter is at 1. Black dashed lines represent individual sections with each section normalized to 1. Red tick marks show estimated laminar borders for cortical layers. (d) Mean neuron distribution for four lines labeling L2/3 (Sepw1\_NP39), L5-IT (Tlx3\_PL56), L5-PT (Sim1\_KJ18), and L6 (Ntsr1\_GN220) in three cortical areas. (e) Different targets of IT-type (Tlx3\_PL56) and PT-type (Sim1\_KJ18) neurons, illustrated with single axon reconstructions: IT-type neurons (blue) project to ipsi- and contralateral cortex (Ctx) and striatum (Str), while PT-type neurons (gold) target ipsilateral cortex and striatum, as well as subcortical targets in thalamus (Thal), superior colliculus (SC) and brainstem. (f-h) Low and high magnification images in NeuroLucida of an injection site in a Sim1\_KJ18 mouse. White box in (f) indicates magnified area (g and h). Scale bars 0.5 mm. (h) Annotation of somata at injection site in NeuroLucida. Blue circles (for red injection) indicate AAV-infected cell bodies expressing smFPs. (i and j) Coordinates of somata from NeuroLucida and fiducial markers placed along the pial surface of cortex and white matter were aligned to the CCF using the same coordinate transform as for the structure channel of the given brain. The somata for three injections (teal, burgundy, and purple) and fiducial markers (gray) were then plotted in 3-d (axes as indicated, with 1 mm scale bar, coronal viewpoint). This projection was rotated (j) for a dorsal view showing the center of mass (teal) for the burgundy injection and the anterior/posterior spread of infected somata. (k) Center of mass of Tlx3\_PL56 (N=92, circles) and Sim1\_KJ18 (N= 62, triangles) injections plotted in the CCF and spatially clustered. Eight clusters are shown in red (M2), orange (ALM), purple (vM1), burgundy (fM1), green (lIM1), yellow (fS1), teal (vS1), and gray (orfS1). Indeterminate injection sites are in black. Sites are superimposed on an image of the dorsal surface of mouse cortex. Black cross marks midline and bregma.

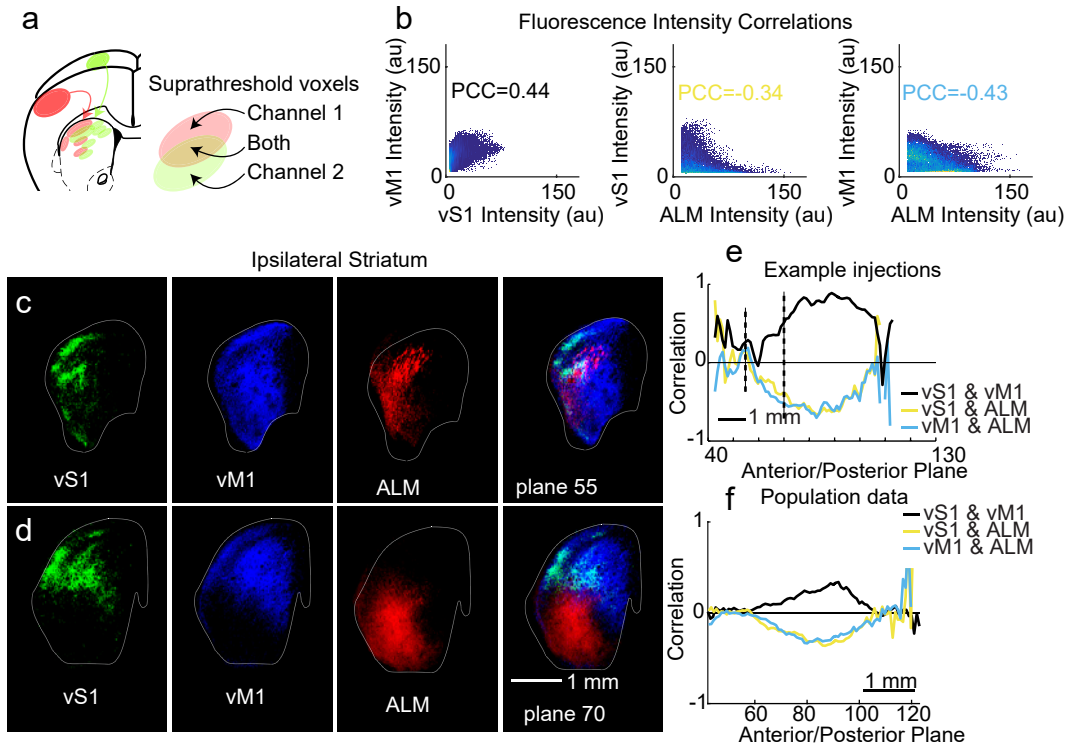

**Figure 2 | Computation of correlation for projections to ipsilateral striatum**

(a) Correlation for two injections (red and green channels) in a given structure (striatum, illustrated) is computed based on voxels where both channels are suprathreshold. (b) For three example Tlx3\_PL56 (IT-type) mouse injections in vM1, vS1, and ALM, scatterplot of all voxel intensities (8-bit imaging; arbitrary units) in ipsilateral striatum for two injections. Blank space between axis and points indicates threshold. Individual points in dark blue; multiple points increase yellow intensity. (c-d) Example coronal images from aligned brains in corresponding planes showing arborization of IT-type axons in ipsilateral striatum. vS1 shown in green, vM1 in blue, and ALM in red. (e) Correlation coefficient as a function of anterior/posterior plane in ipsilateral striatum for pairwise comparisons between three example injections. Correlation is noisy at anterior and posterior poles of striatum due to small voxel numbers in those planes. (f) Population mean correlation coefficient as a function of anterior/posterior plane in ipsilateral striatum for pairwise comparisons (the mean correlation for each vS1 compared to each vM1 in black, for example). vS1 and vM1 comparison, N=340 injection pairs; vS1 and ALM comparison, N=204; vM1 and ALM comparison, N=240.



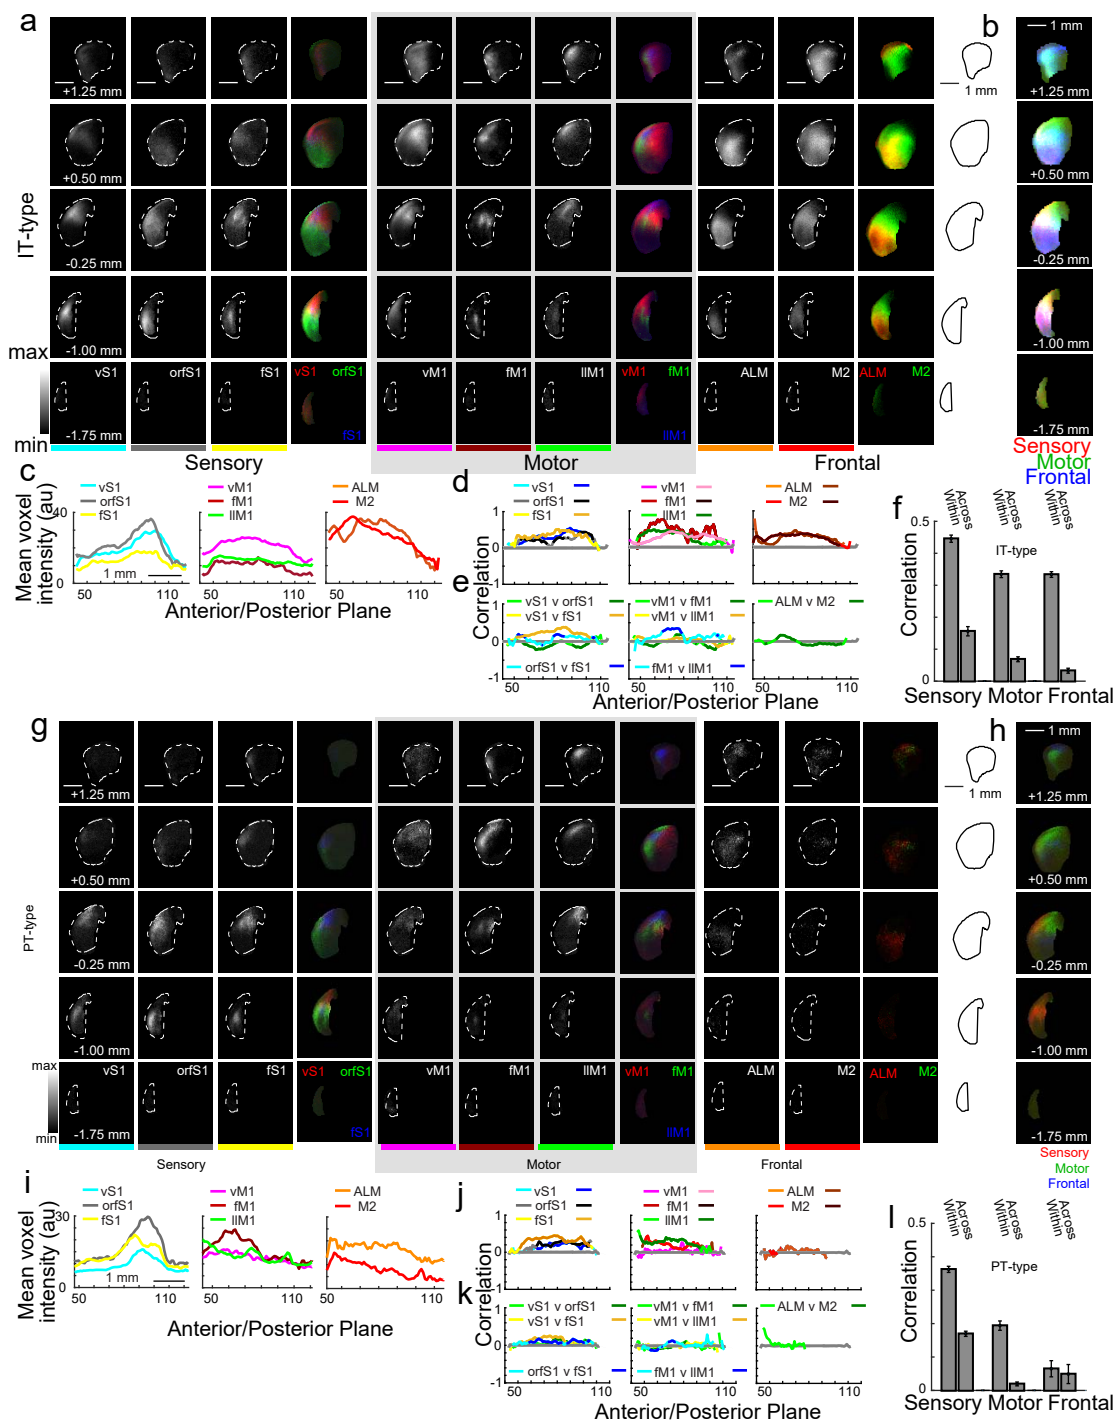

**Figure 3 | Topography of sensory, motor, and frontal corticostriatal projections from IT-type and PT-type neurons**

(a) Images of average corticostriatal projections from IT-type neurons. Rows represent images at five coronal planes from anterior (+1.25 mm to bregma) to posterior (-1.75 mm to bregma). A dashed white line outlines ipsilateral striatum. Scale bar, 1 mm (top panel). Voxels are 50x50x50 μm. Columns represent the eight injection site clusters, organized into sensory (vS1, orfS1, and fS1), motor (vM1, fM1, IIM1), and frontal (ALM and M2) modalities. Black and white images show average normalized projections for a given injection site cluster. For comparison, these are color coded and presented together at the right to show within-modality topography. For example, vS1 projections in red are generally more dorsal and orfS1 in green are generally more ventral. (b) Average normalized sensory (red), motor (green), and frontal (blue) projections are shown to illustrate topography across modalities. (c) Mean voxel intensity along the anterior/posterior axis of ipsilateral striatum. Scale bar, 1 mm; each plane is 50 μm. Each injection site cluster is color coded after Fig. 1. (d) Within cluster comparisons show high correlation for nearby injections in the same cluster. The sensory plot shows mean correlation for a given vS1 injection compared to other vS1 injections. Two colors are used (left, teal; right, blue) with the right-hand color indicating locations along the anterior/posterior axis where correlation coefficient is significantly different from shuffled data ( $p < 0.001$ , rank sum test). Legend for all comparisons shows two colors for each injection site cluster (right color, significant differences). Similar comparison performed for all eight clusters. Comparisons made in planes for injections where both share >100 suprathreshold voxels. (e) Across cluster comparisons compare injections within the same modality. For sensory clusters, vS1 injections are compared to orfS1 (green) and fS1 (yellow), and orfS1 injections are compared to fS1 (blue). Across cluster comparisons are also compared for motor (center) and frontal (right) injections. (f) Mean correlations within (vS1-vS1) and across (vS1-orfS1, etc.) ipsilateral corticostriatal projections from IT-type pyramidal neurons. Correlations within a given injection cluster are greater than correlations across functionally similar nearby clusters. (g-l) Images and analysis for PT-type projections, presented as for IT-type projections.

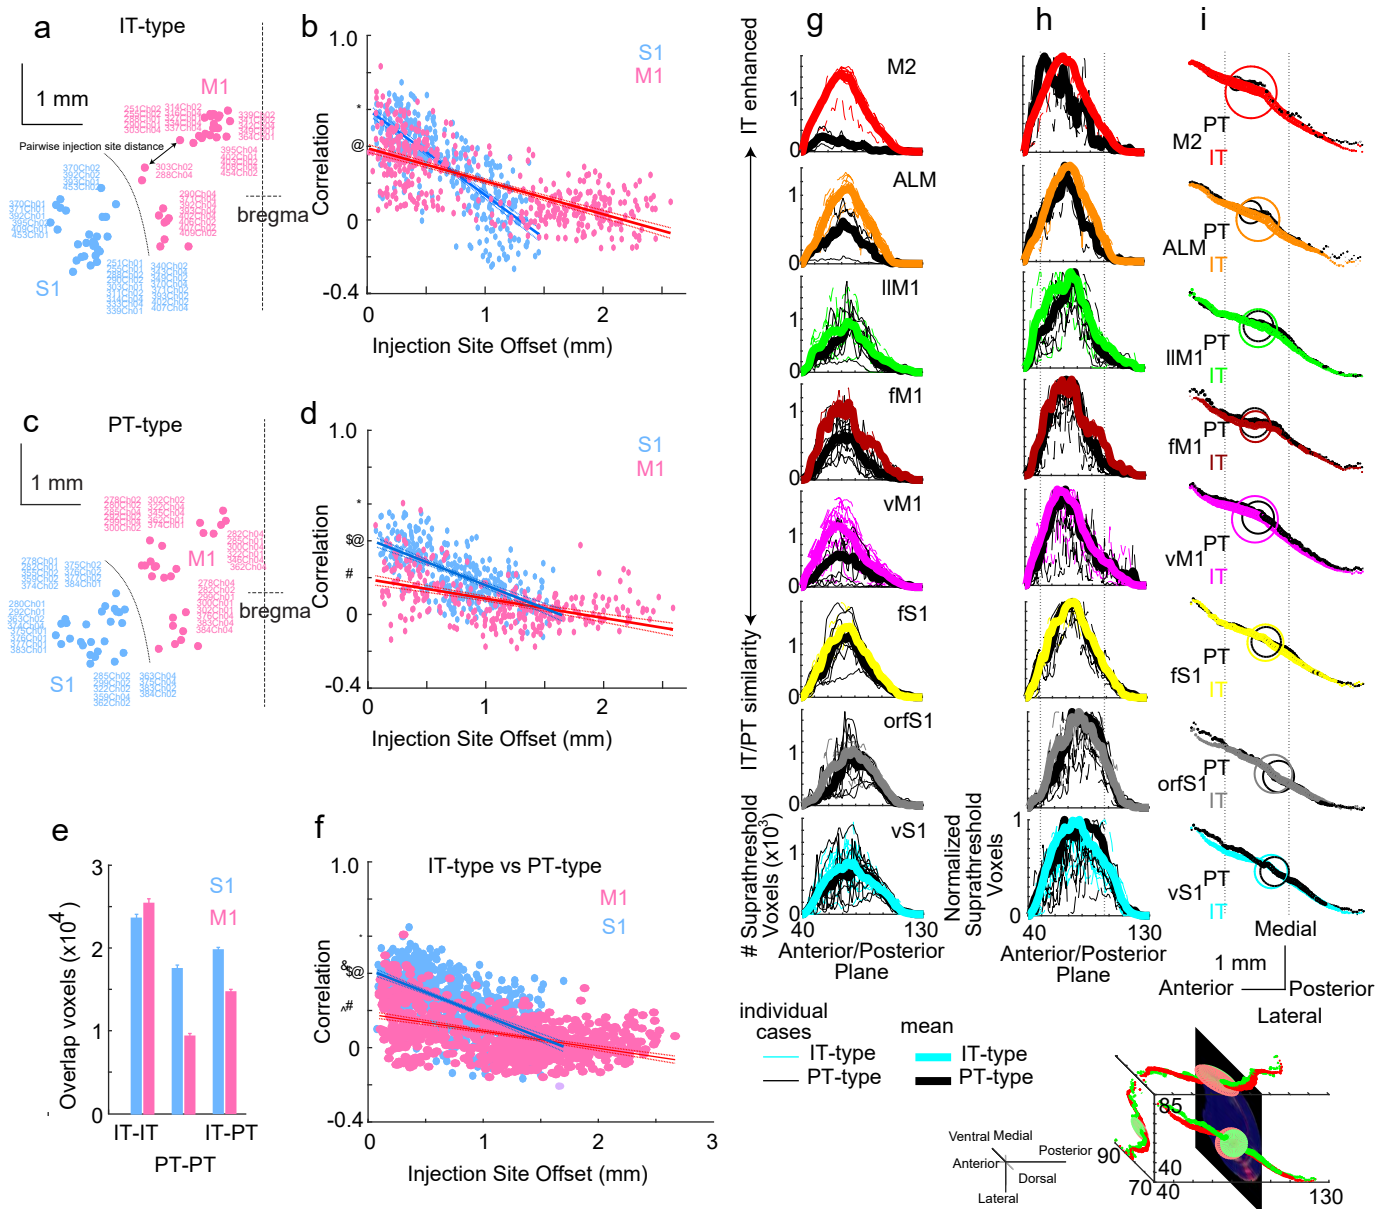

**Figure 4 | Somatotopic precision across the corticostriatal projectome compared across cortical areas and cell types**

(a,b) Pairwise correlation between projections to ipsilateral striatum from IT-type (a-b) and PT-type (c-d) pyramidal neurons was determined and plotted against injection site offset in mm. (a, c) Dorsal view of injection sites in CCF coordinates. Midline and bregma indicated at right. Scale bars, 1 mm. All primary sensory (S1) injections are shown in blue and primary motor (M1) injections are shown in pink. Circles indicate injection site with injection number labeled. Double headed arrow indicates injection site offset distance for one pair of injections. (b, d, f) Correlation versus injection site offset for S1 and M1 injections. Solid line represents linear fit, with confidence interval plotted as dashed lines. Typographic marks indicate y-intercept across panels for comparison. (e) Mean number of overlapping voxels used to calculate correlations for IT-IT (b), PT-PT (d), and IT-PT (f) comparisons. (f) Correlation versus injection site offset for comparisons across IT-type and PT-type injections in S1 and M1. Here, each S1 IT-type injection is compared to each S1 PT-type injection but not to other IT-type injections. (g) The anterior/posterior location of suprathreshold voxels in ipsilateral striatum was quantified for all individual IT-type and PT-type injection cases. Individual cases are shown as thin dashed lines, while thicker lines represent the mean. IT-type projections are highlighted in color corresponding to their injection cluster (for example, vS1 is teal) while the corresponding PT-type projections from the same cluster are plotted in black on the same axes for comparison. Number of suprathreshold voxels is similar for vS1, orfS1, and fS1 injections. Suprathreshold voxels for IT-type projections from frontal areas ALM and M2 exceed those of PT-type projections. (h) Peak normalized distribution of both IT-type and PT-type projections are shown. These peak at similar points on the anterior/posterior axis. (i) To assess differences in targeting of IT-type and PT-type projections within the same injection site cluster, the center of mass of the voxels for the mean normalized injection pattern was calculated for each injection site cluster. The overall center of mass is shown as a large circle (red and green circles, example at left). The center of mass of each coronal plane is also plotted as a circle, and projections along the x-, y-, and z-axes are shown. The size of the circle is proportional to the summed normalized voxel intensity for a given plane. For the example projection at bottom, red (vS1 IT-type projection) and green (vS1 PT-type projection). The anterior/posterior projections for each injection cluster are shown above. The color code corresponds to the injection site cluster (teal for vS1), with PL56 injections shown in color and corresponding PT-type projections shown in black. Dotted line is shown for anterior/posterior alignment across injection clusters. Center of mass of vS1, orfS1, and fS1 (teal, gray, and gold, respectively) are posterior within the striatum, while frontal areas ALM and M2 (orange and red) are anterior. The overall center of mass of projections overlaps for IT- and PT-type cases, resulting in overlap of these markers.

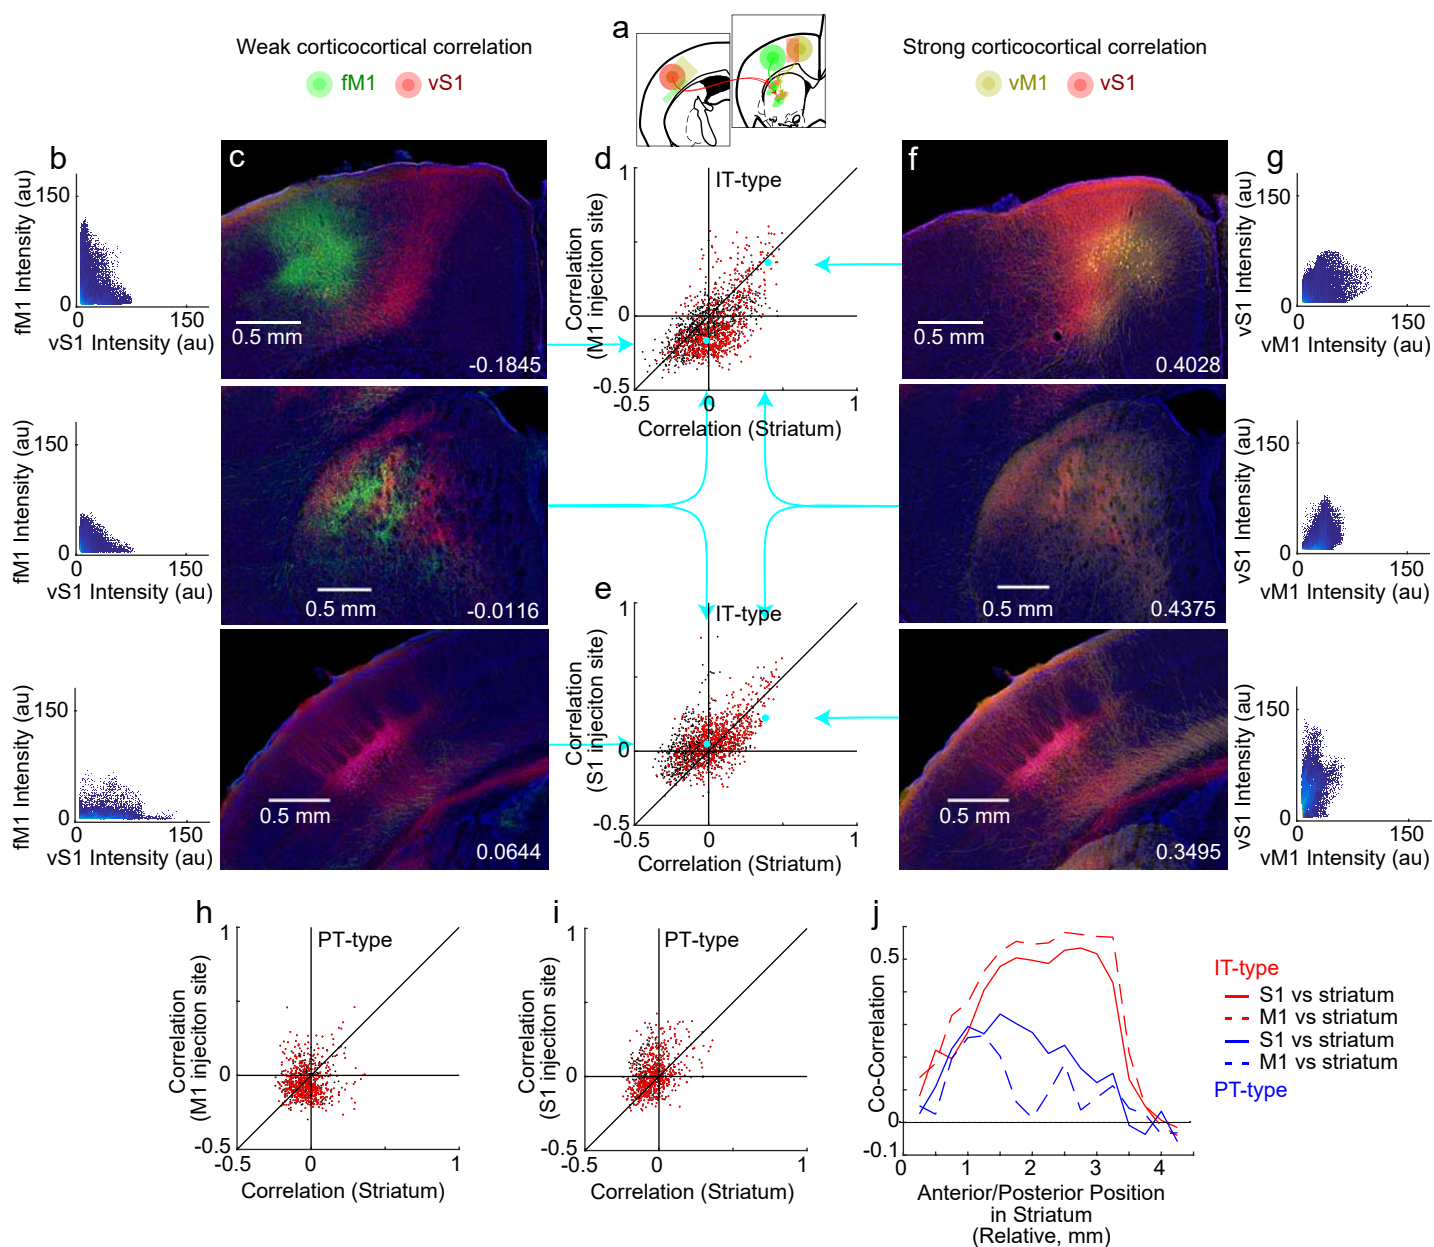

**Figure 5 | Corticostriatal projections map the organization of corticocortical connectivity in IT-type but not PT-type projections**

(a) Sensory and motor cortex injections make reciprocal intracortical projections between somatotopically related areas. (b, c, f, g) IT-type injection examples shown contrast a pair of strongly connected cortical areas (red vS1 and yellow vM1 injections) with a non-somatotopically aligned area (green fM1 injection). vS1 axons (red) overlap poorly with fM1 neurons (green). These are poorly correlated in both injection sites (-0.1845 and 0.0644; b, c top and bottom) as well as the striatum (-0.0116; b, c middle). In contrast, vS1 axons (red) overlap well with vM1 neurons (yellow) and are strongly correlated in both injection sites (0.4028 and 0.3495; f, g top and bottom) as well as the striatum (0.4375; f, g middle). (d, e) Scatterplot of co-correlations of corticocortical connectivity (using injection site overlap) and corticostriatal connectivity for IT-type projections. Each individual point represents the corticostriatal correlations (x-axis) and injection site correlation (y-axis) for a single pair of injections with corticocortical correlation computed at either M1 (d) or S1 injection sites (e). Red points on the scatterplot compare sensory and motor injections. Black points add comparisons to frontal areas (M2 and ALM). Teal arrows and points indicate specific points corresponding to the example injections shown. (h, i) Scatterplot of co-correlations of corticocortical connectivity and corticostriatal connectivity for PT-type projections. (j) Co-correlations of corticocortical connectivity and corticostriatal connectivity are re-assessed, with corticostriatal correlations (y-axis) calculated using subsets of striatal voxels along the anterior/posterior axis in 250  $\mu$ m segments (x-axis, in mm). Co-correlation is plotted for IT-type (red) and PT-type (blue) injections.

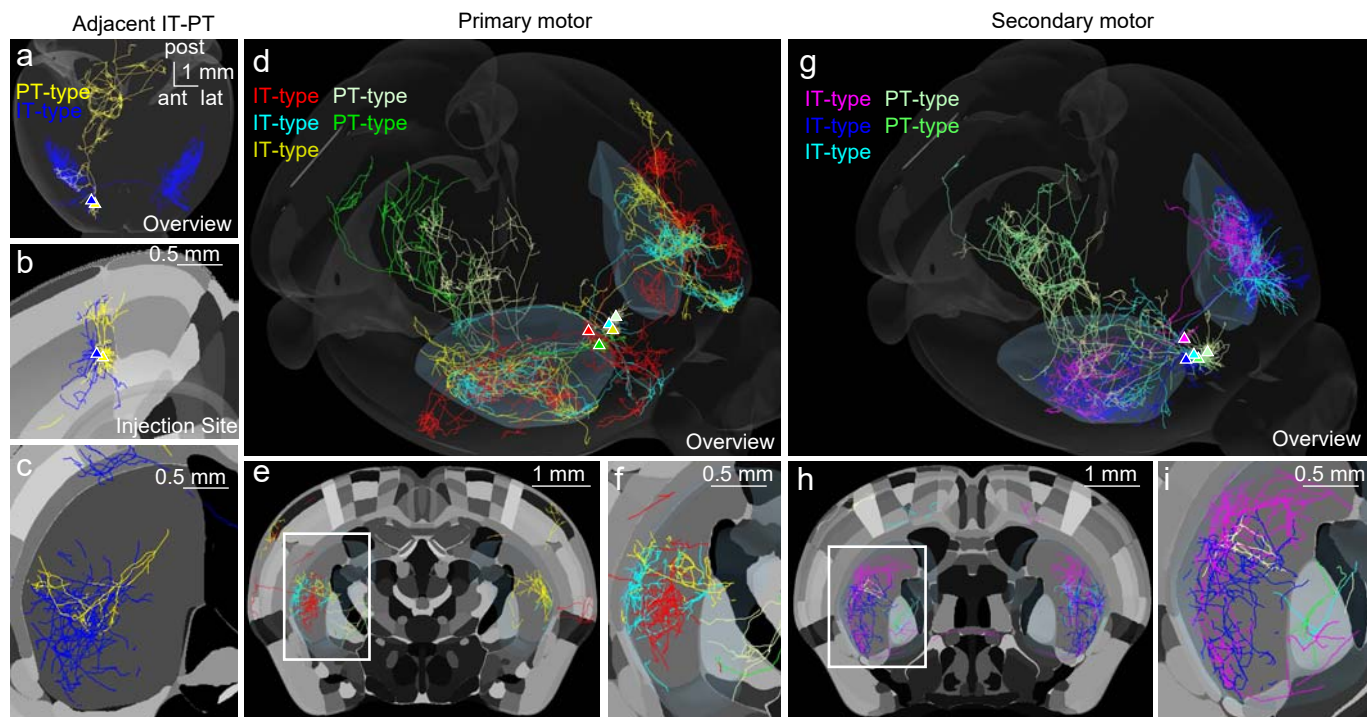

**Figure 6 | Single neuron reconstructions of IT-type and PT-type neurons in motor areas**

(a) Reconstruction of the long-range axonal projections of adjacent PT-type (blue) and IT-type (gold) L5 pyramidal neurons<sup>31</sup>. Projections throughout the whole CNS anterior to medulla are shown in the reference atlas (CCF) coordinates, with annotated regions shown in gray. (b) Somata are in adjacent in primary motor cortex (M1). (c) Corticostriatal projections show similar general topography with differences in arbor size and density. (d) Five adjacent IT-type (red, teal, and gold) and PT-type (green and white) M1 neurons. (e,f) Corticostriatal projections show topography of IT-type and PT-type projections, as well as differences in density, terminal field size, and asymmetry of projections to contralateral striatum. White box in (e) magnified in (f). (g-i) Five adjacent IT-type (purple, teal, and blue) and PT-type (green and off-white) secondary motor cortex (M2) neurons.



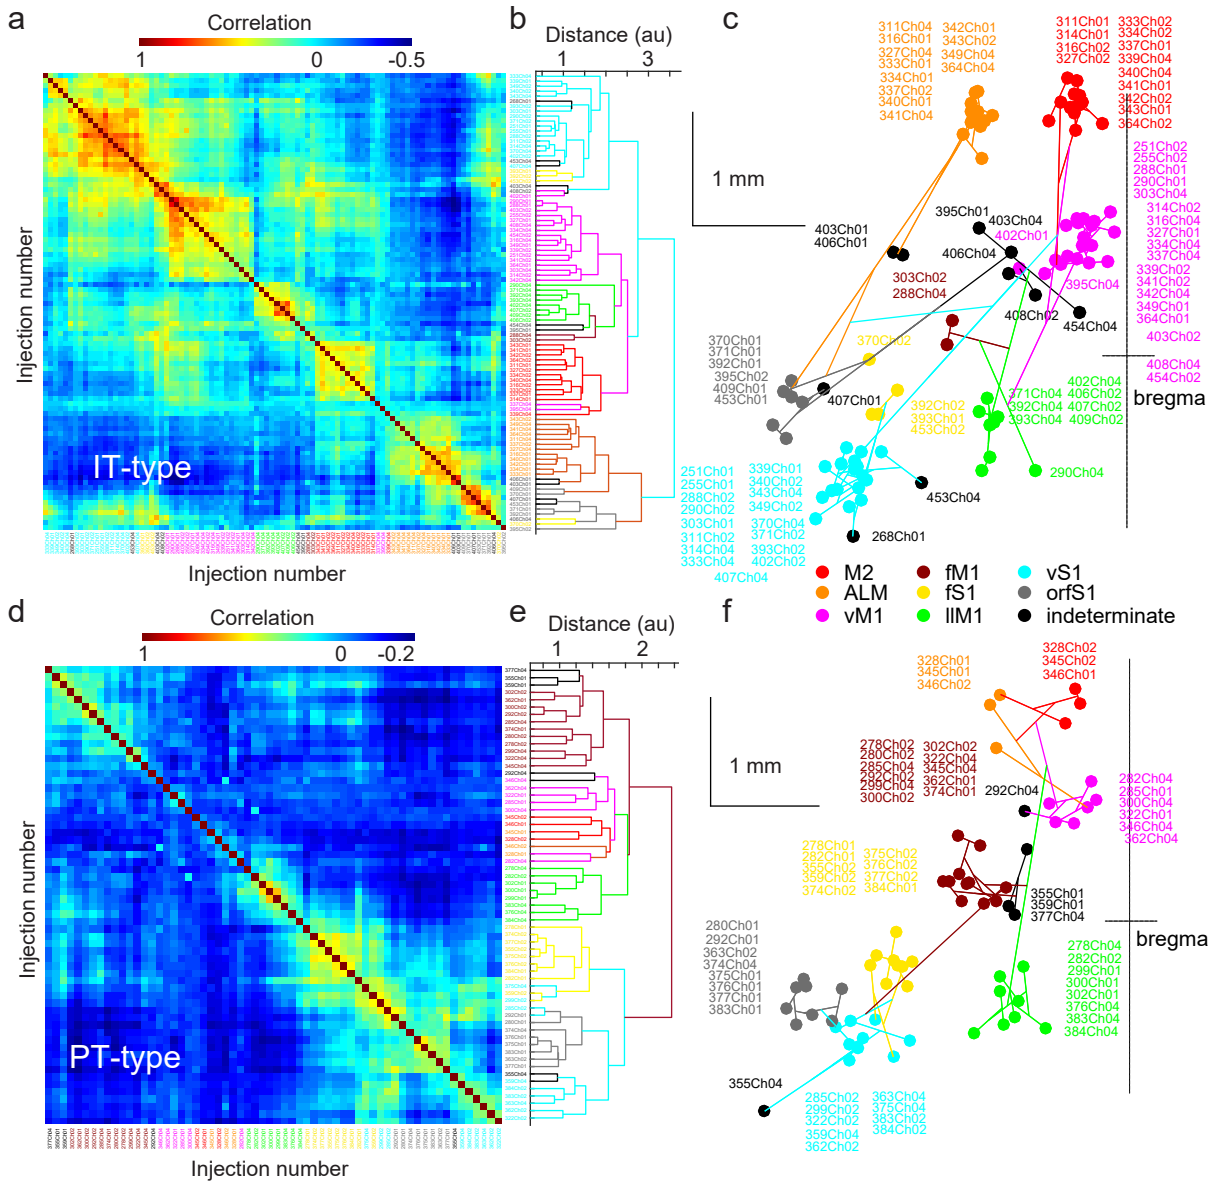

**Figure 7 | Hierarchical clustering of IT-type and PT-type corticostriatal projections**

(a) Pairwise correlation scores for all IT-type projections studied (N=92). High correlation, red (with perfect correlation along the main diagonal). Negative correlation, blue. (b) Injections were hierarchically clustered using correlation score as the distance measure. Individual injections at the tips of the dendrogram were color-coded according to the injection site location cluster to which they were assigned. (c) Using a dorsal view of the brain (with bregma marked at right; scale bars, 1 mm), the dendrogram from (b) was plotted using the center of mass of the injection site as the point for the tip of the tree. (d-f) Pairwise correlation scores and dendrograms for all PT-type projections studied (N=62), plotted as for IT-type projections.



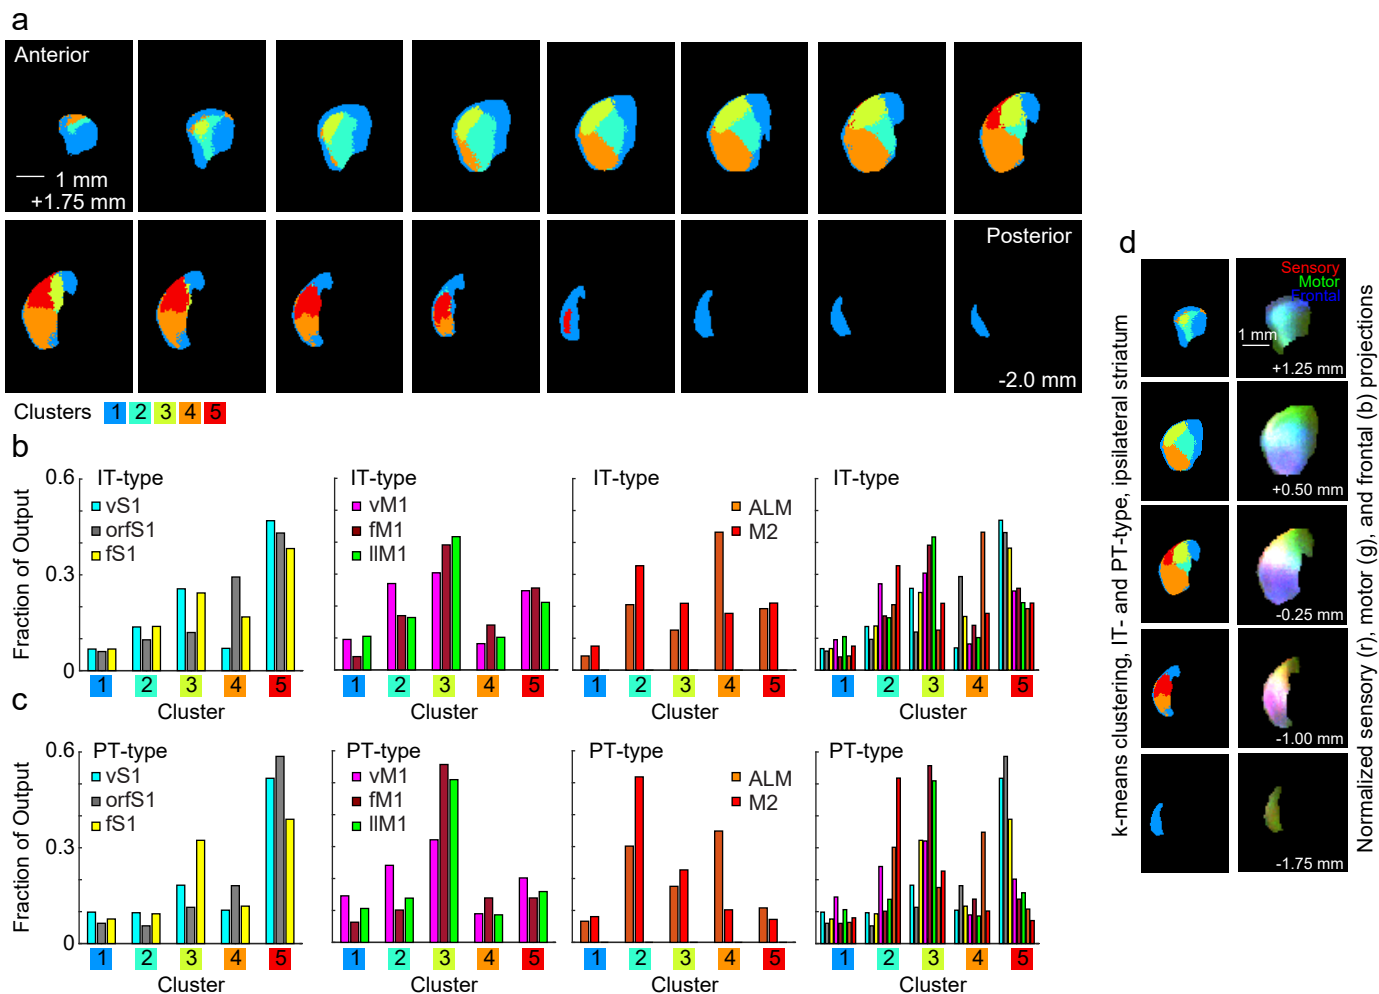

**Figure 8 | Major divisions of ipsilateral striatum based on sensory and motor cortical projections**

(a) k-means clustering of striatal pixels based on mean normalized fluorescence intensity from each of the eight injection site clusters for both IT-type and PT-type pyramidal neurons. The striatal clusters are illustrated as five colors (legend, at bottom) in evenly spaced planes every 0.25 mm from anterior (top left) to posterior (bottom right). Scale bar, 1 mm. (b) The fraction of the output from each of the eight injection site clusters to a given striatal division from IT-type projections. Graphs are divided into sensory (left), motor (center), and frontal (right), with all areas together at far right. (c) The fraction of the output from each of the eight injection site clusters to a given striatal division from PT-type projections, presented as in (b). (d) A comparison of the striatal divisions based on k-means clustering (left) to the pattern of normalized sensory (red), motor (green), and frontal projections (blue), presented as an RGB image (right).
